# Supplementary material for: A new donor for charge-transfer systems: synthesis and properties of 2,4,7,9-tetramethyl-1,6-dithiapyrene (TMDTP) and structure of (TMDTP)3(PF6)2·2THF and TMDTP–TCNQ
Source: RSC Adv. 2021 Apr 20;11(24):14607–14. doi: 10.1039/d1ra00587a (PMC8697854; doi:10.1039/d1ra00587a)

# Supplementary material for Bendix, Bechgaard and Christensen: Synthesis and Properties of 2,4,7,9-Tetramethyl-1,6- dithiapyrene (TMDTP) and Structure of (TMDTP)<sub>3</sub>(PF<sub>6</sub>)<sub>2</sub>·2THF and TMDTP-TCNQ.

---

## Table of content:

S1-S18: Determination of composition of the mixture of 2,6- and 2,7-dimethylnaphthalene.

S19-S24: NMR of compound **4**.

S25-S29: NMR of compound **5**.

S30-S35: NMR of compound **6**.

S36-S41: NMR of compound **7**.

S42-S47: NMR of compound **3**.

Full  $^1\text{H}$ -NMR spectrum of 2,6-Dimethylnaphthalene in  $\text{CDCl}_3$

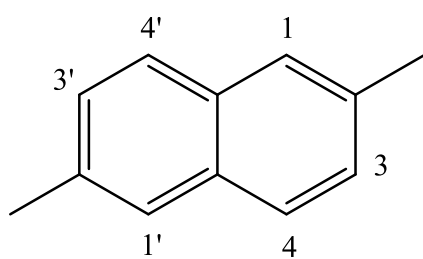

2,6-DMN

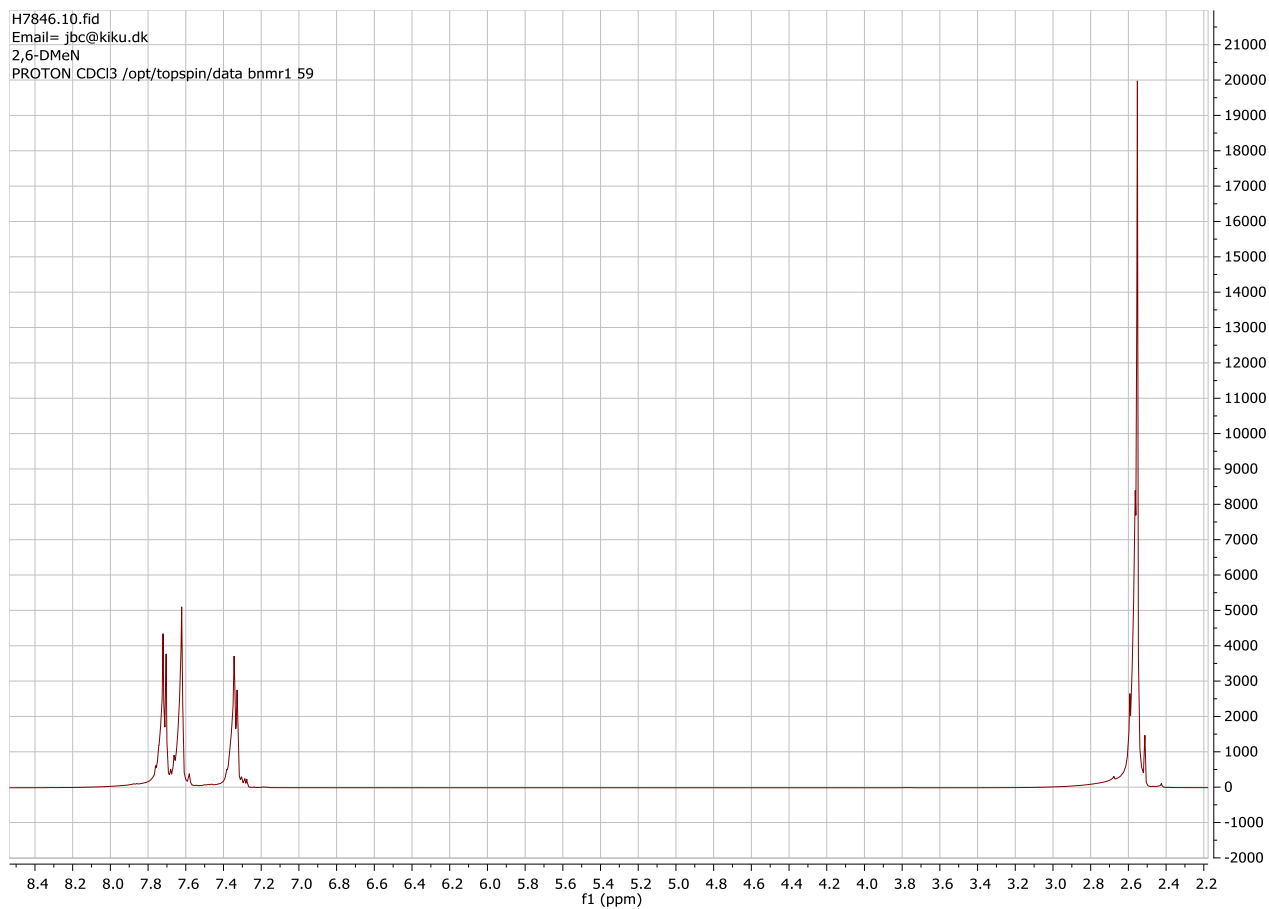

Full  $^1\text{H}$ -NMR spectrum of 2,7-Dimethylnaphthalene (2,7-DMN) in  $\text{CDCl}_3$

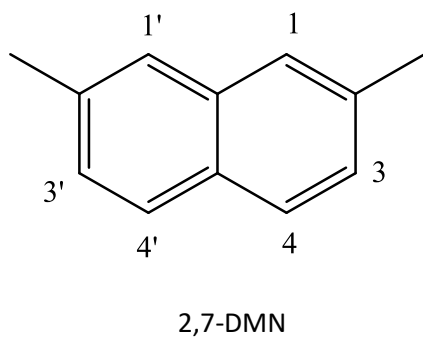

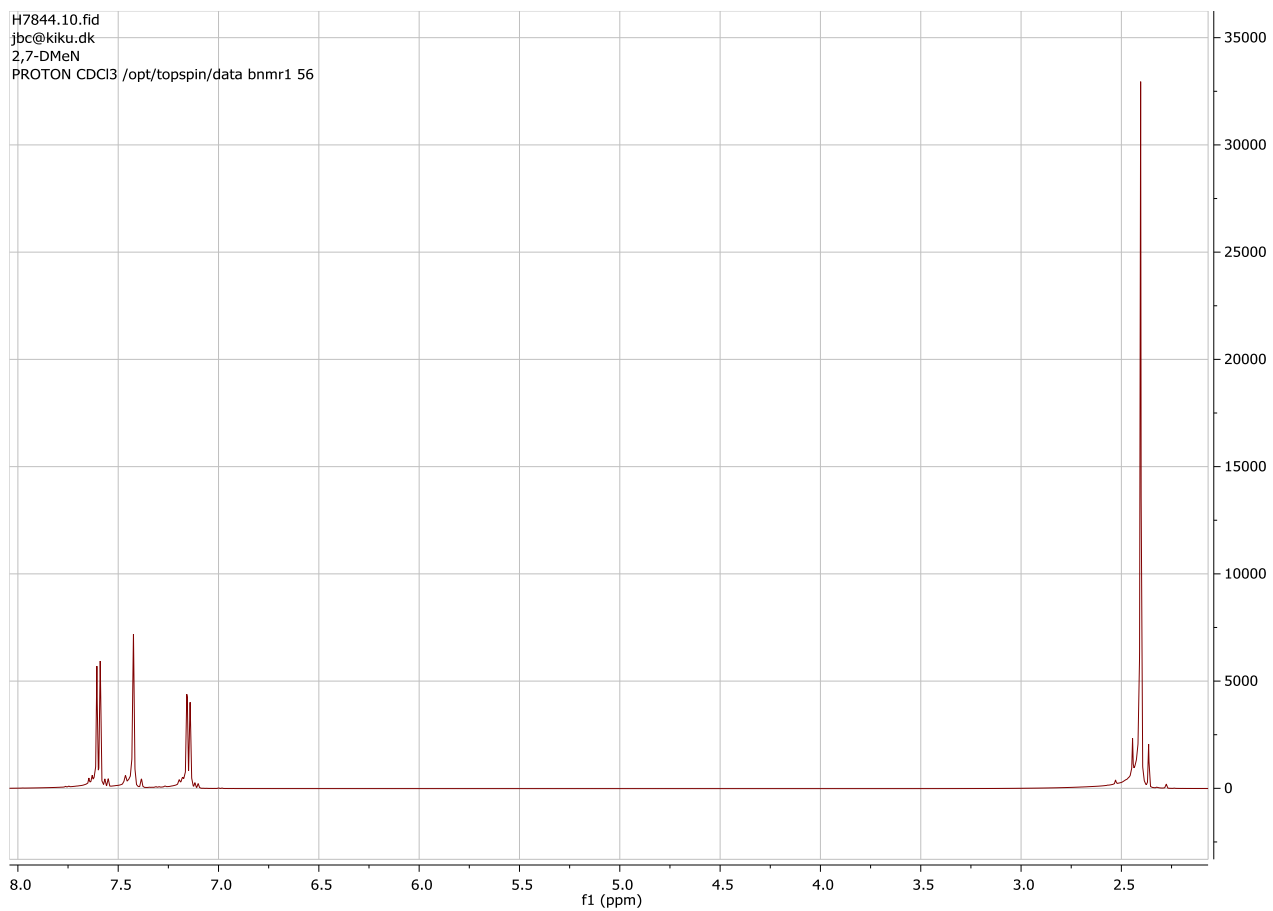

2,6-DMN and 2,7-DMN interacts in  $\text{CDCl}_3$  as seen from the  $^1\text{H}$ -NMR spectra:

### Mixture of 2,6- and 2,7-DMN

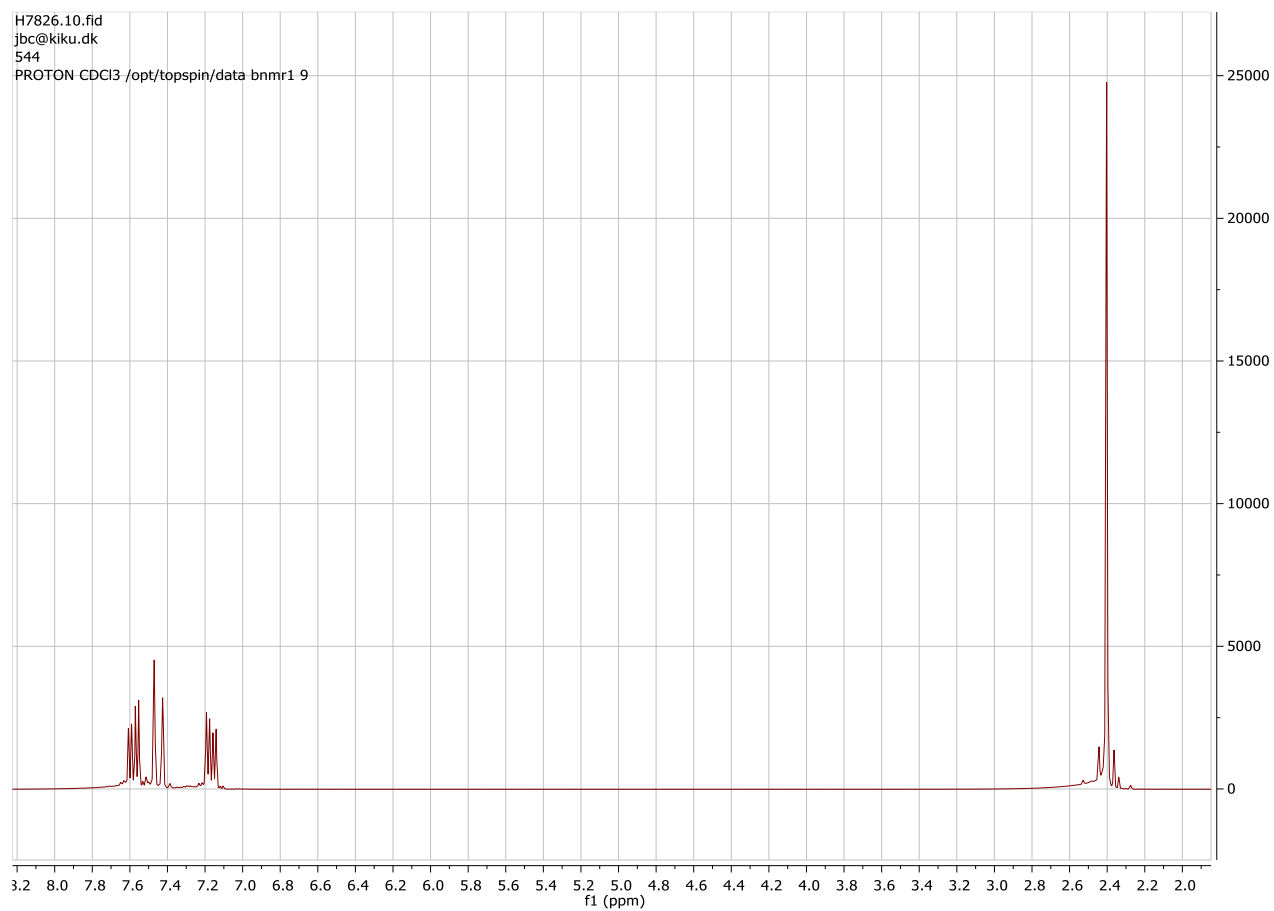

All 3  $^1\text{H}$ -spectra expanded in the aromatic area and stacked:

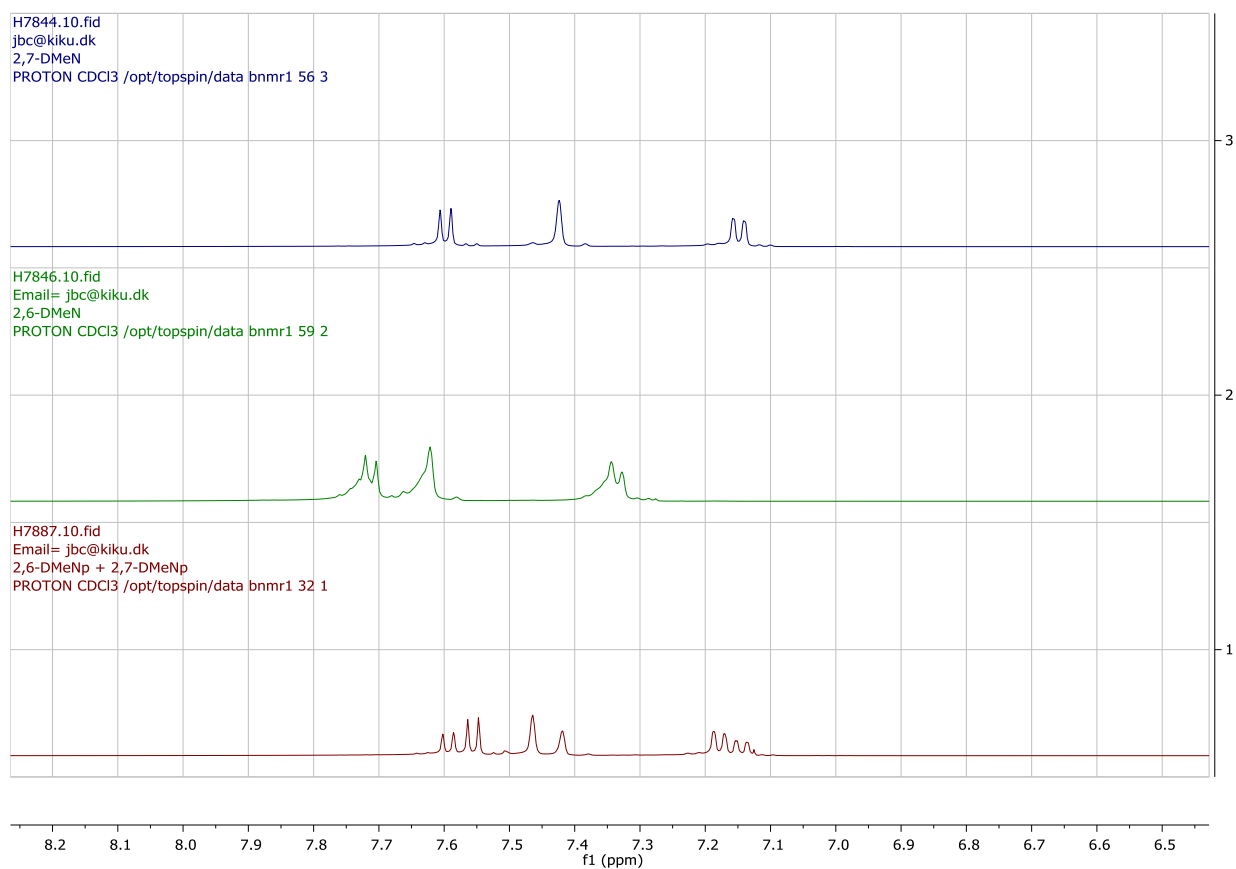

Legend: 2,7-DMN is blue, 2,6-DMN is green and the mixture of 2,6- and 2,7-DMN is red (formed by mixing the solutions of 2,6- and 2,7-DMN).

There is some interaction taking place between the 2,6- and the 2,7-DMN. The carbon-spectra are however unchanged:

All 3  $^{13}\text{C}$ -spectra expanded in the aromatic region and stacked:

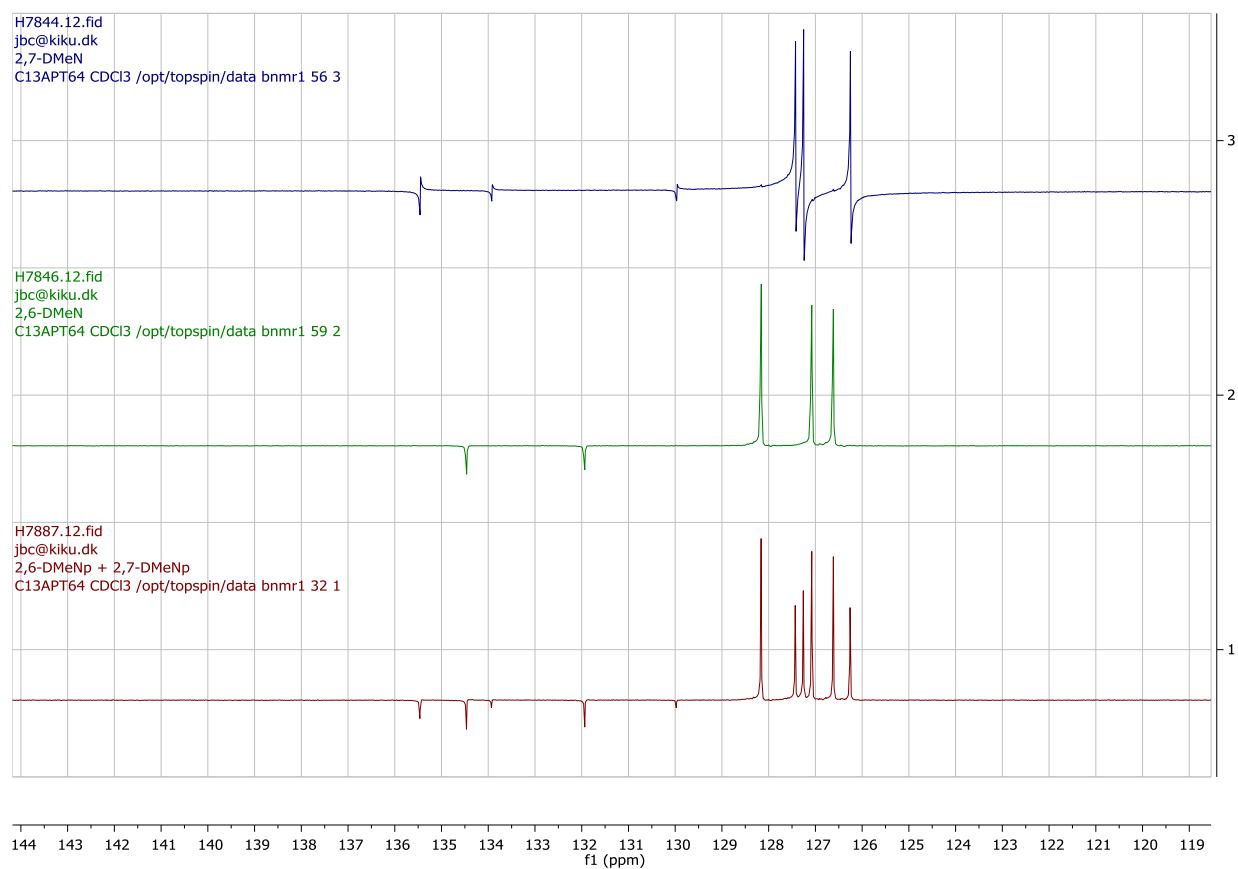

Legend: 2,7-DMN is blue, 2,6-DMN is green and the mixture of 2,6- and 2,7-DMN is red. None of the carbon-signals are shifted upon mixing the two isomers.

Assigning the protons in 2,6-DMN by  $^1\text{H}$ -COSY in  $\text{CDCl}_3$ :

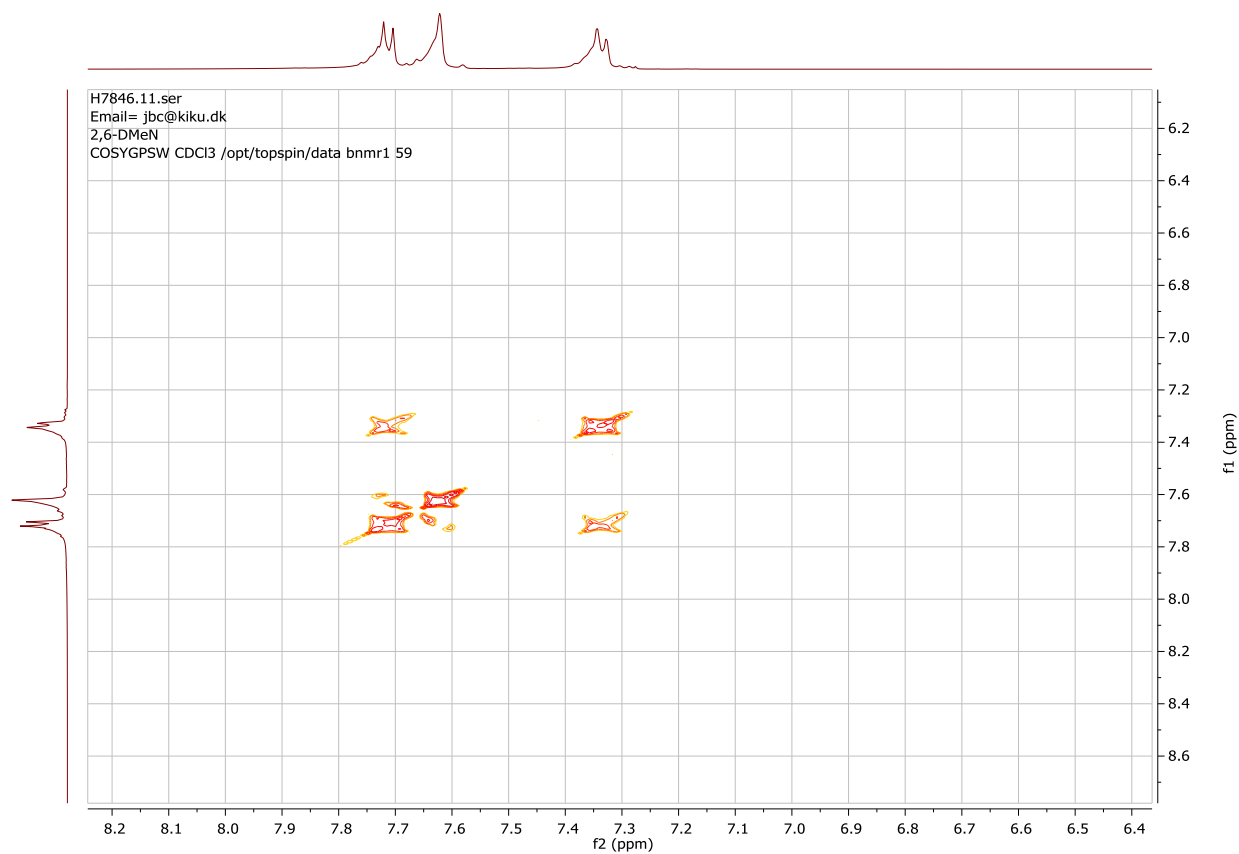

H 1 & H1': 7.33 ppm (s), but small meta-coupling to H3, H3'

H4, H4': 7.71 ppm (d,  $J = 10$  Hz)

H3, H3': 7.34 ppm (d,  $J = 10$  Hz)

HSQC-spectrum of 2,6-DMN in  $\text{CDCl}_3$  was used to find assign C1/C1' to H1/H1':

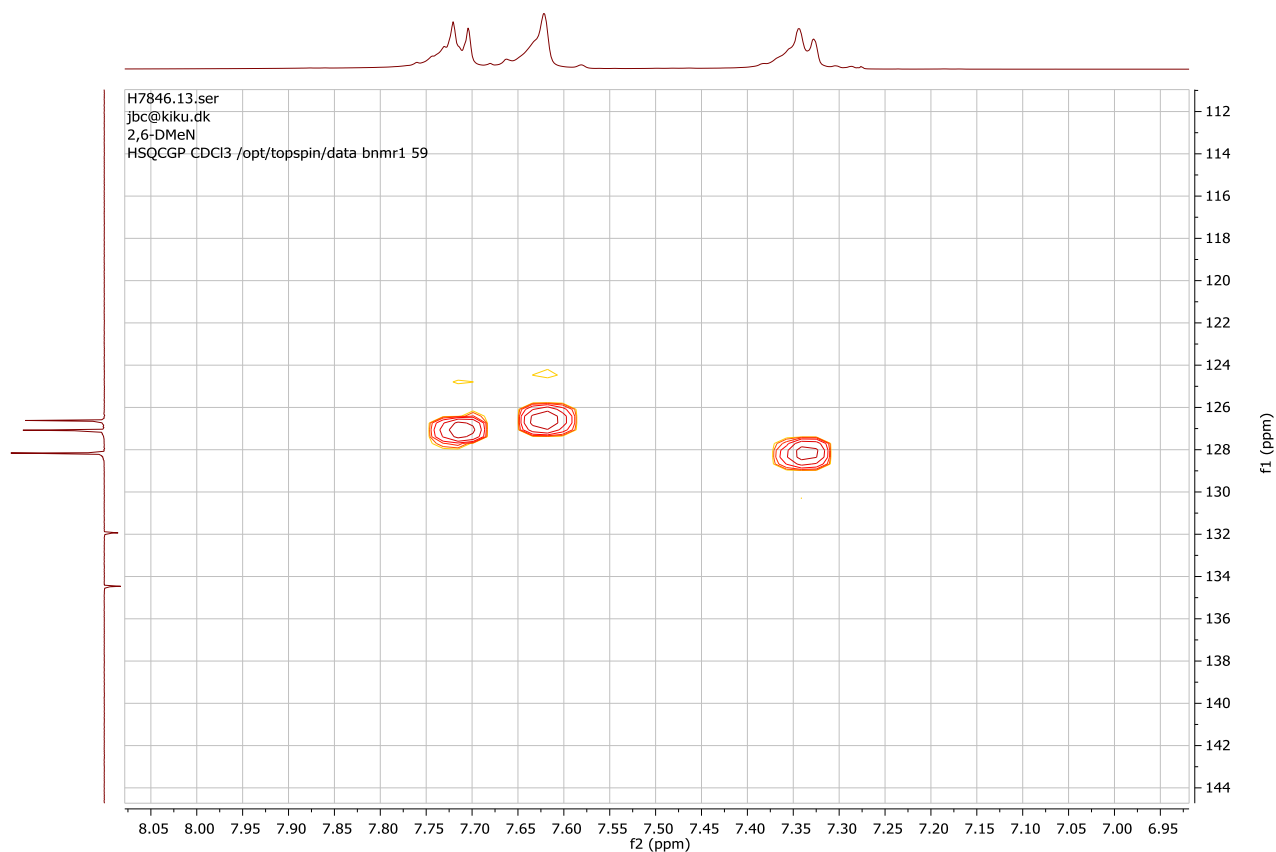

Shows that the carbon at 126.65 ppm is bound to proton 1 and 1'.

This allows identification of H1/H1' in the mixture of 2,6- and 2,7-DMN:



Assigning the protons in 2,7-DMN by 1H-COSY in CDCl<sub>3</sub>:

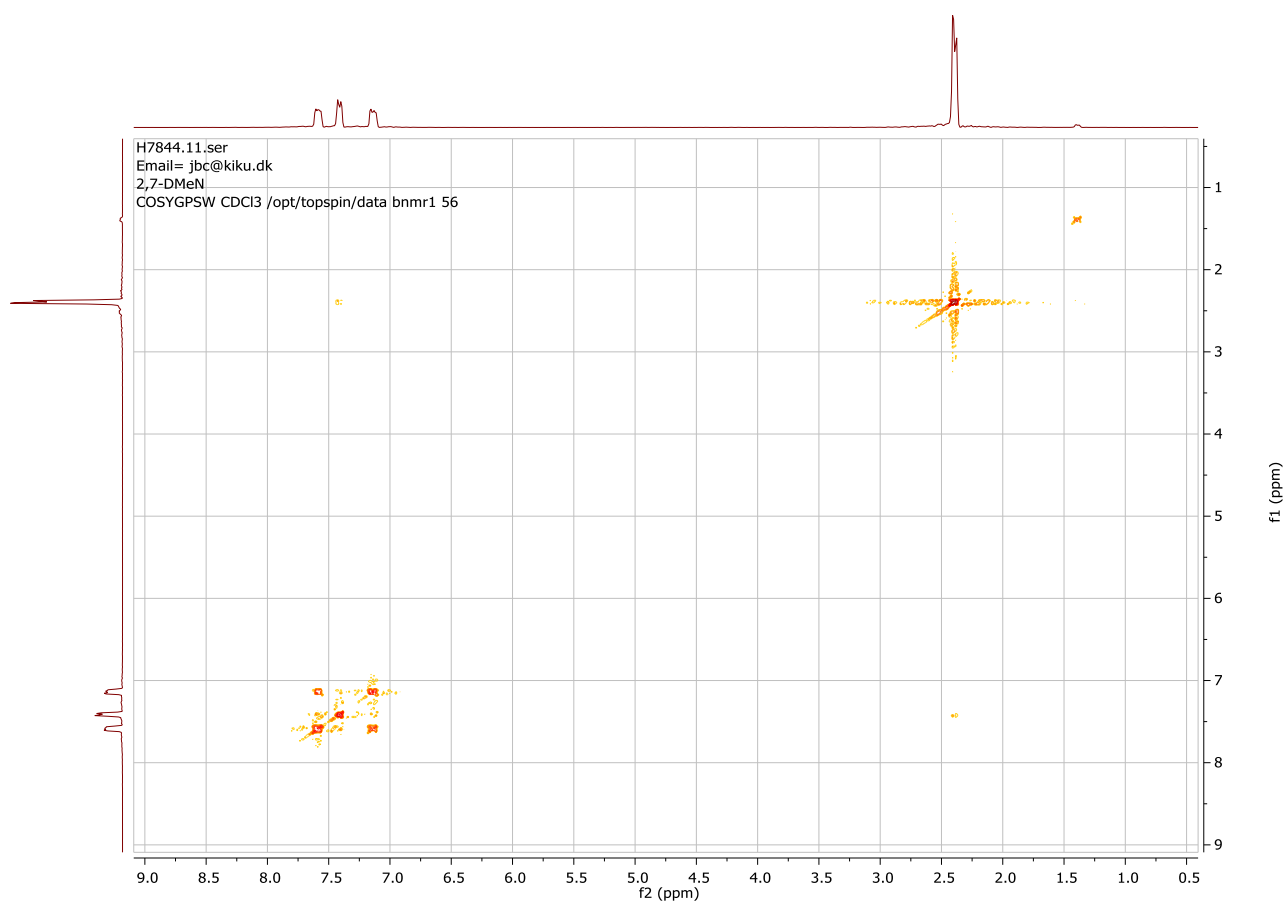

H 1 & H1': 7.42 ppm (s)

H4, H4': 7.60 ppm (d, J = 10 Hz)

H3, H3': 7.34 ppm (d, J = 10 Hz)

HSQC-spectrum of 2,7-DMN in  $\text{CDCl}_3$  was used to find assign C1/C1' to H1/H1':

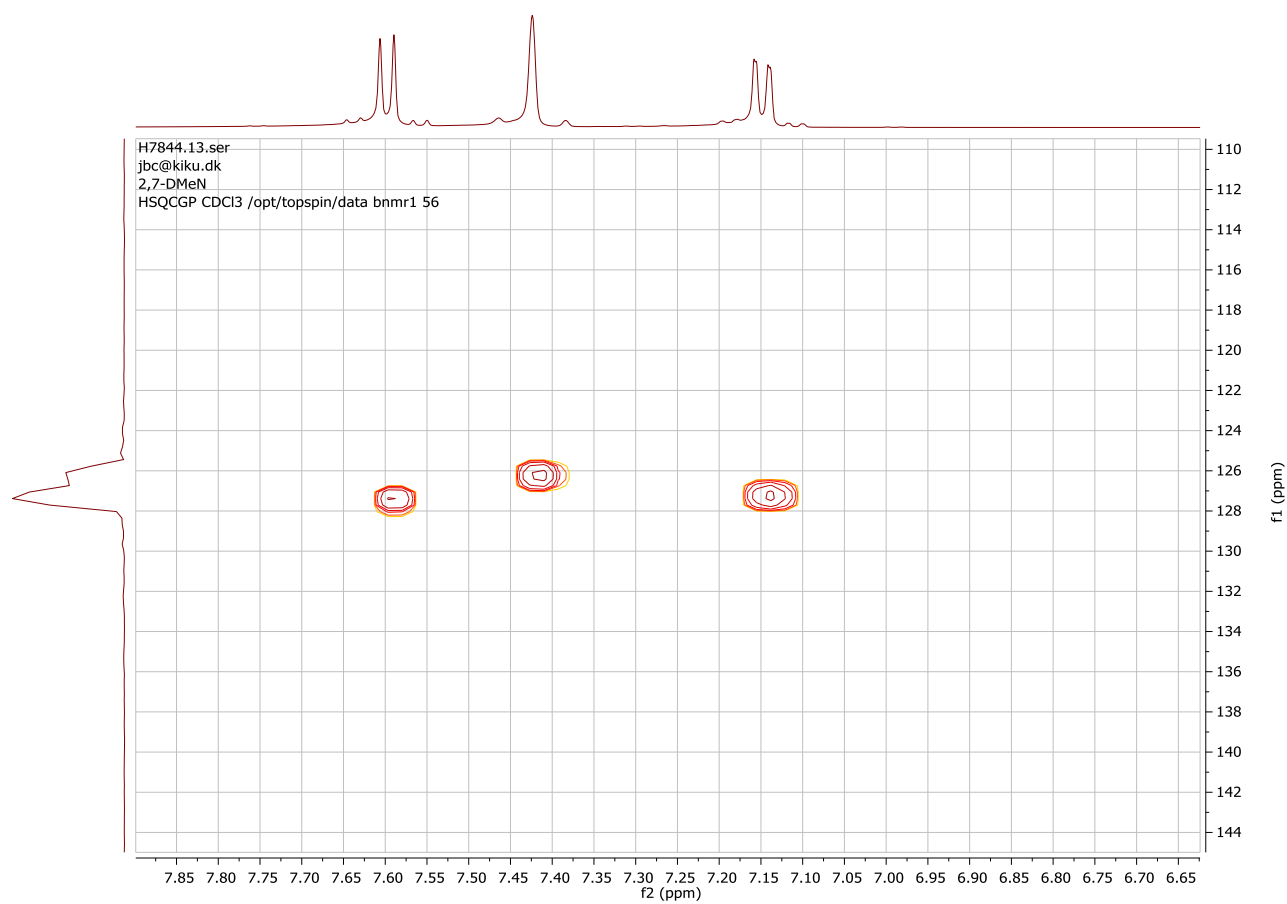

The NMR-spectra in  $\text{CDCl}_3$  of the eutectic mixture isolated by crystallization looks:

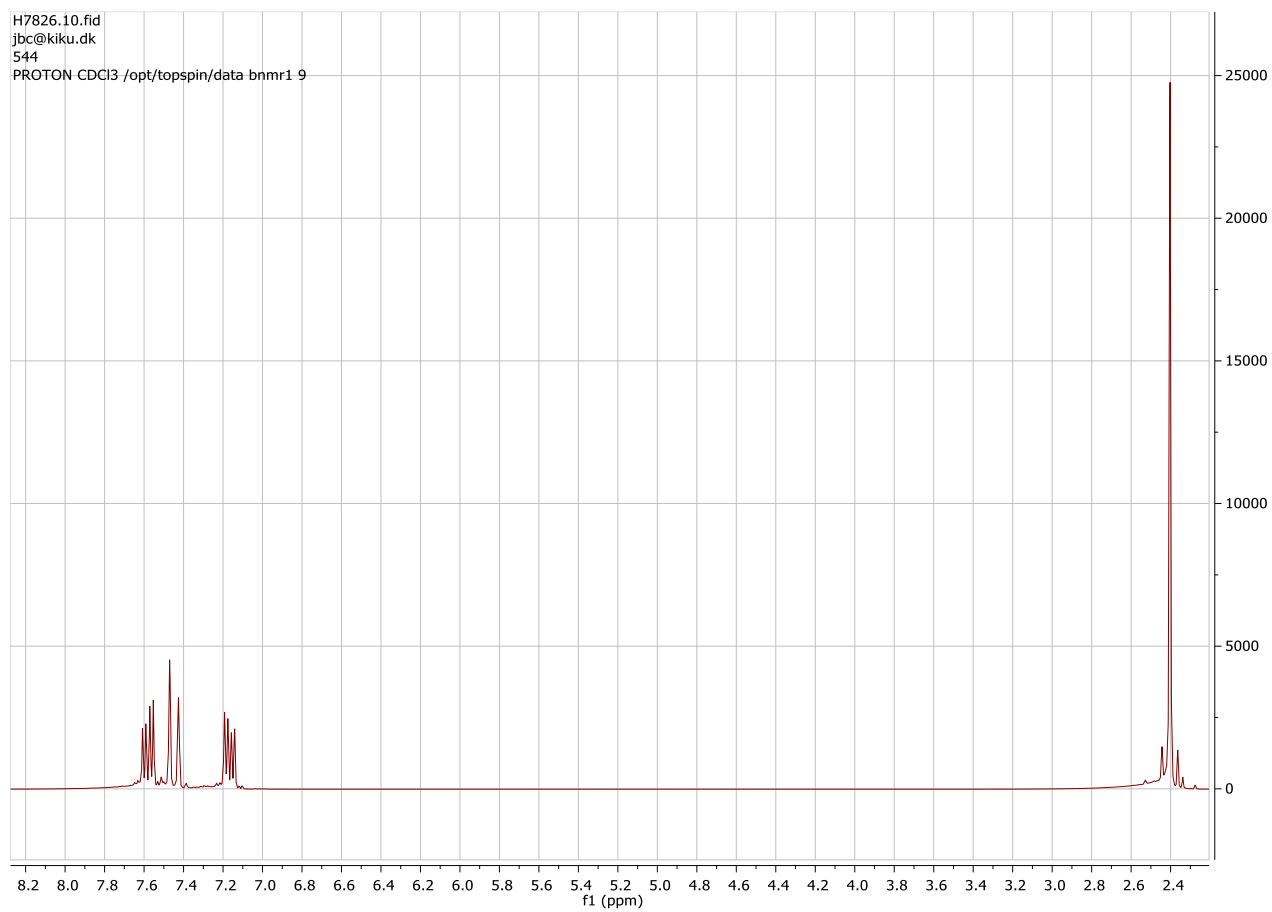

Expanded:

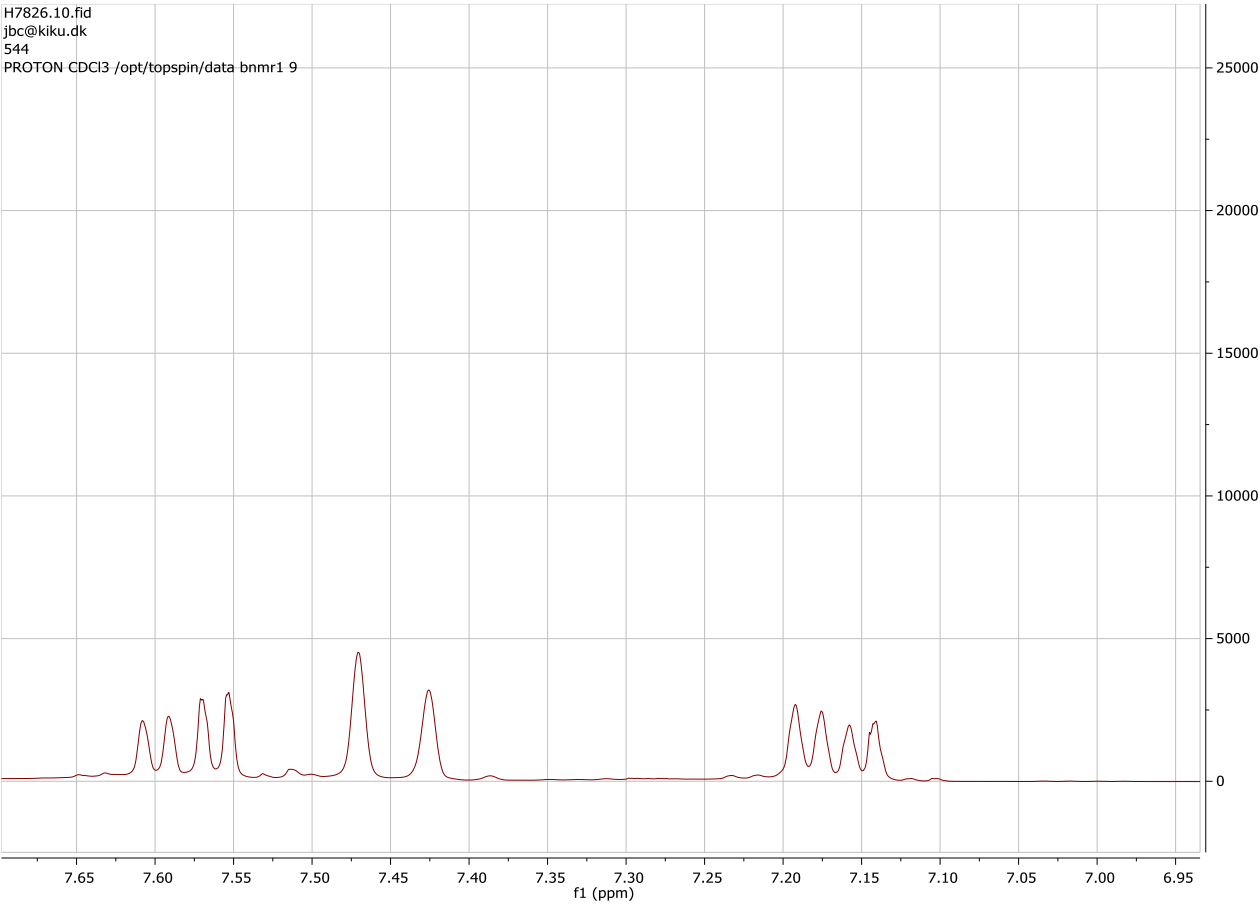

$^1\text{H}$ -COSY:

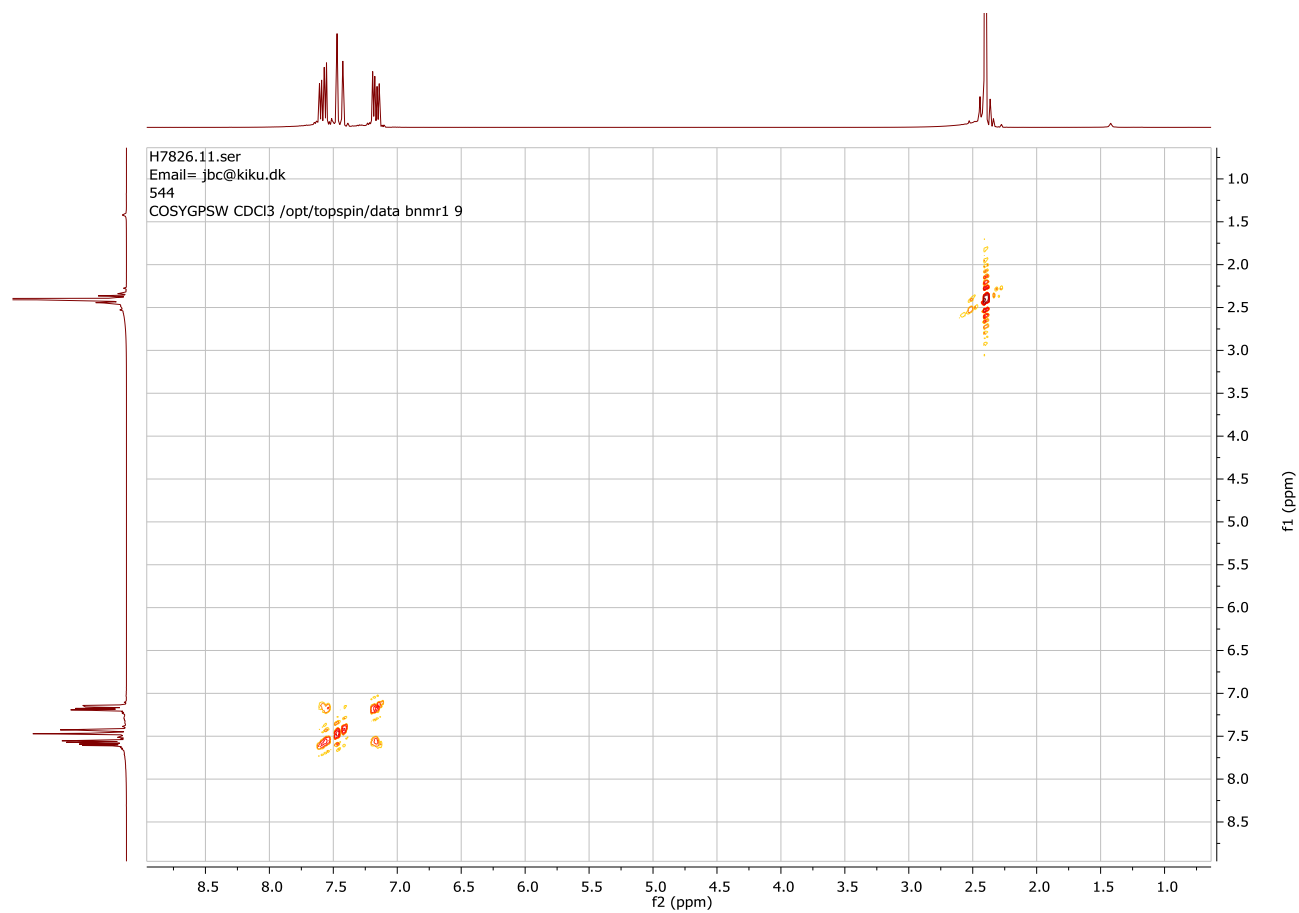

$^{13}\text{C}$ -NMR:

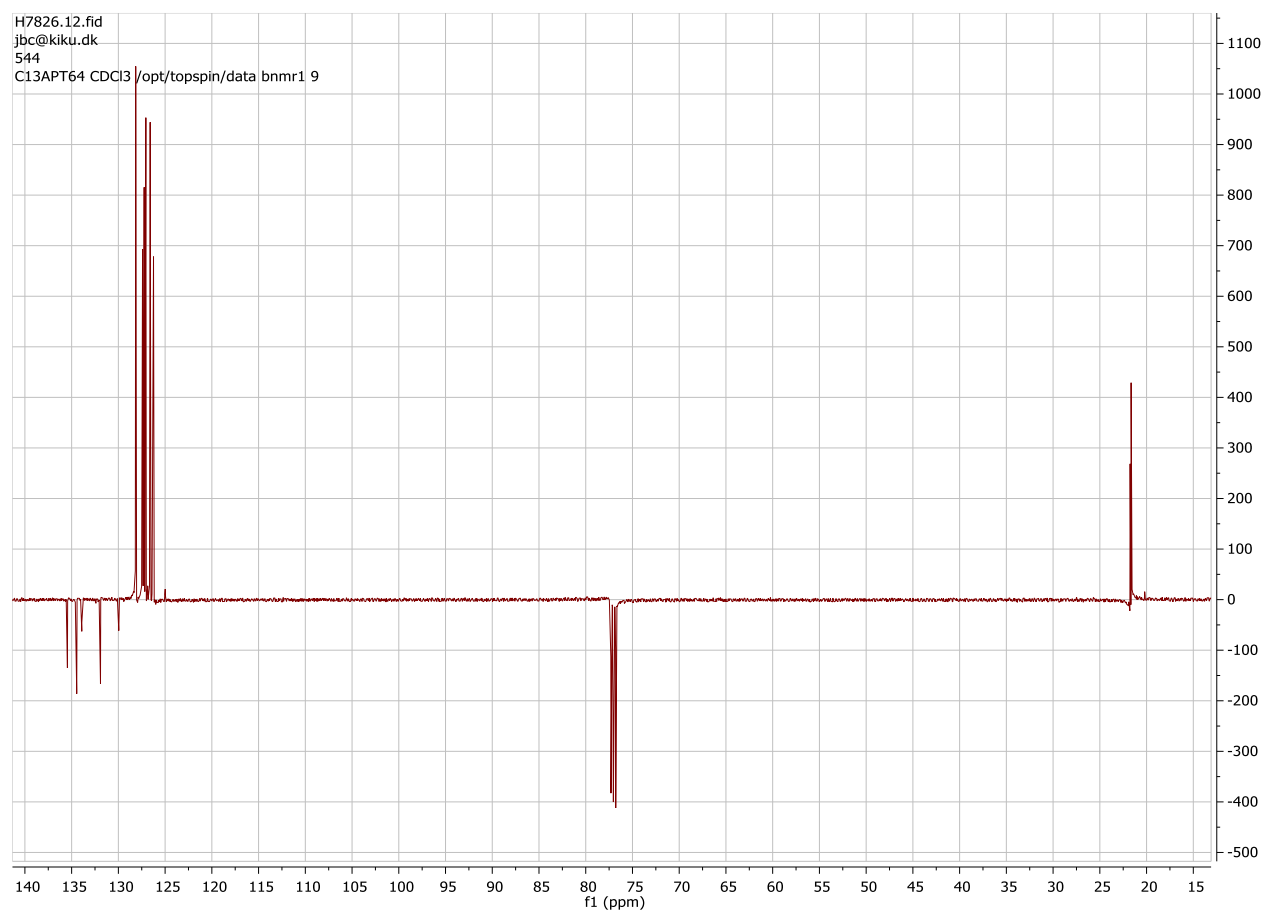

# HSQC-NMR:

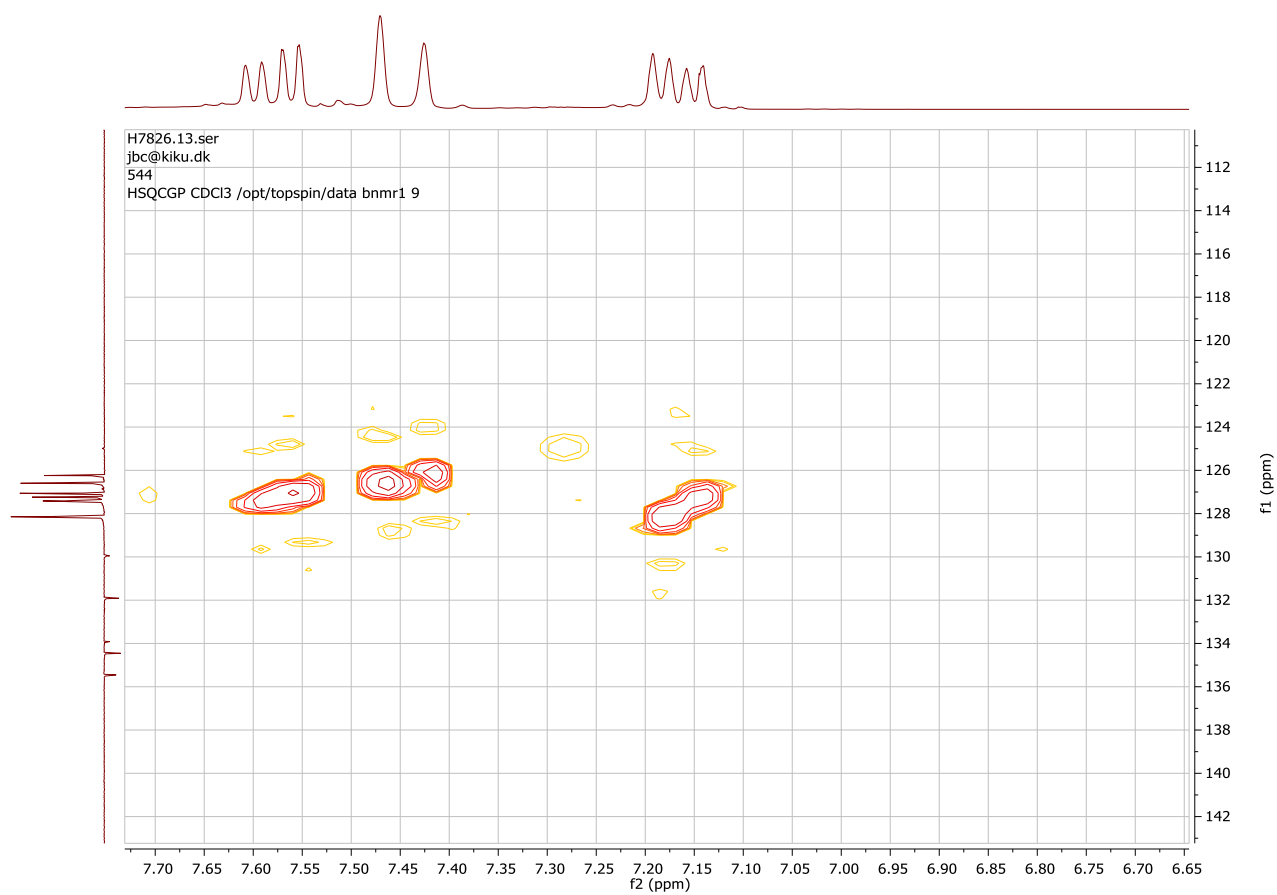

HSQC-spectrum of the mixture of 2,6- and 2,7-DMN in CDCl<sub>3</sub>. Finding H1/H1' in 2,6-DMN:

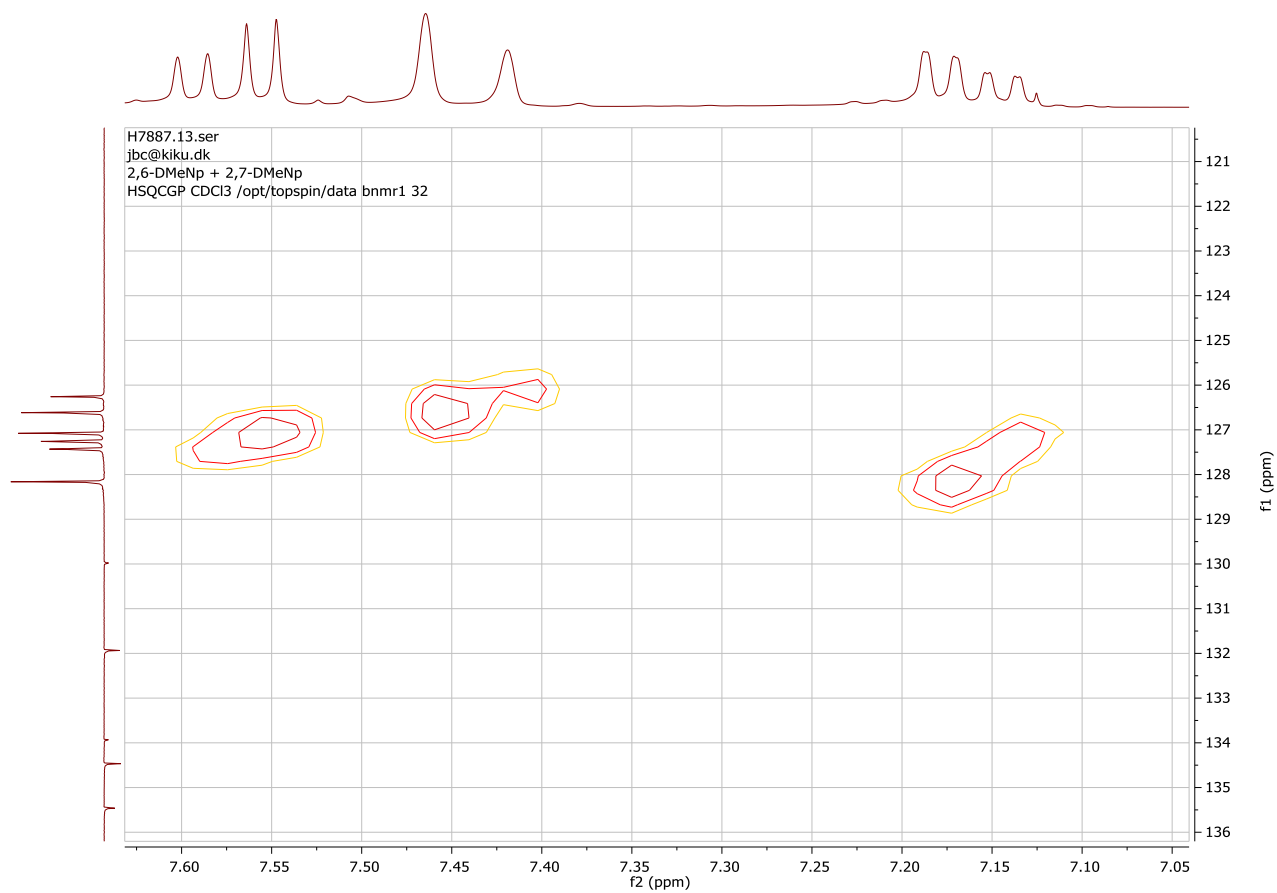

The peak at 7.46 ppm corresponds to H1/H1' in 2,6-DMN and the peak at 7.42 ppm corresponds to H1/H1' in 2,7-DMN.

Determining the composition:

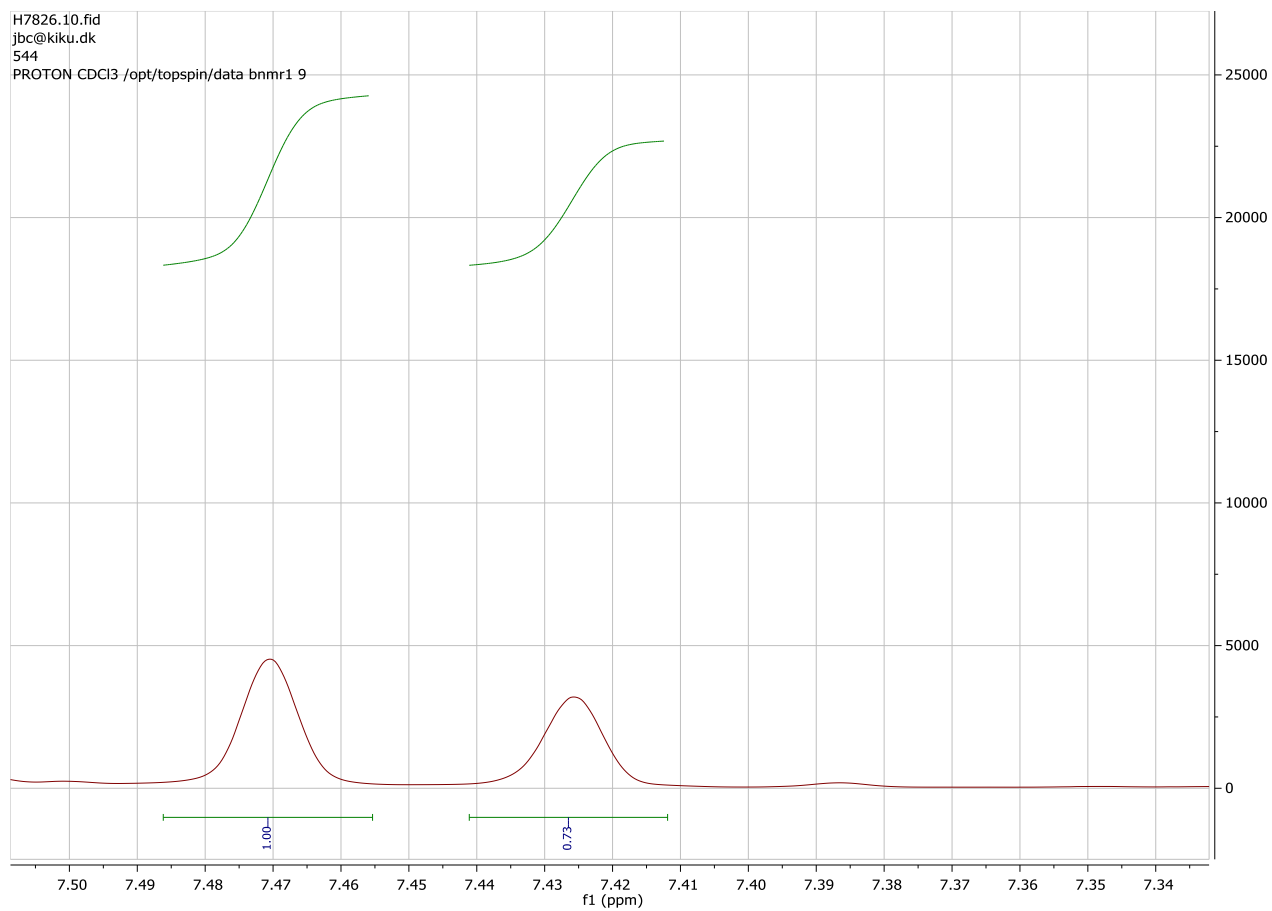

Gives a 1:0.73 ratio between 2,6- and 2,7-DMN corresponding to 58 % 2,6-DMN in the mixture.

NMR-spectra of compound **4** in CDCl<sub>3</sub>

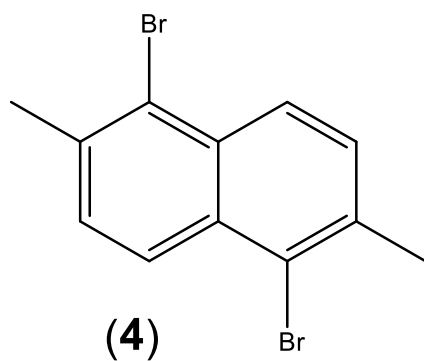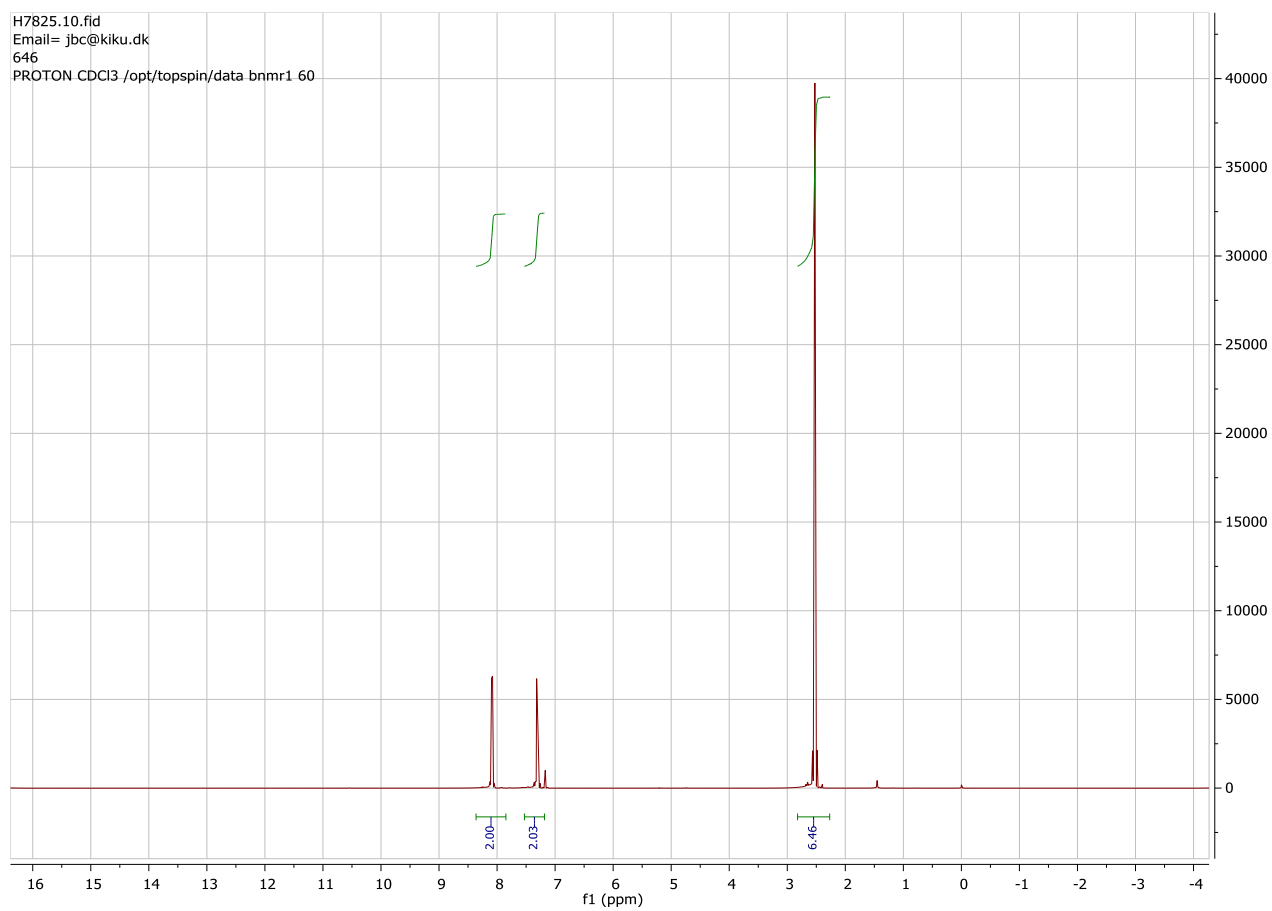

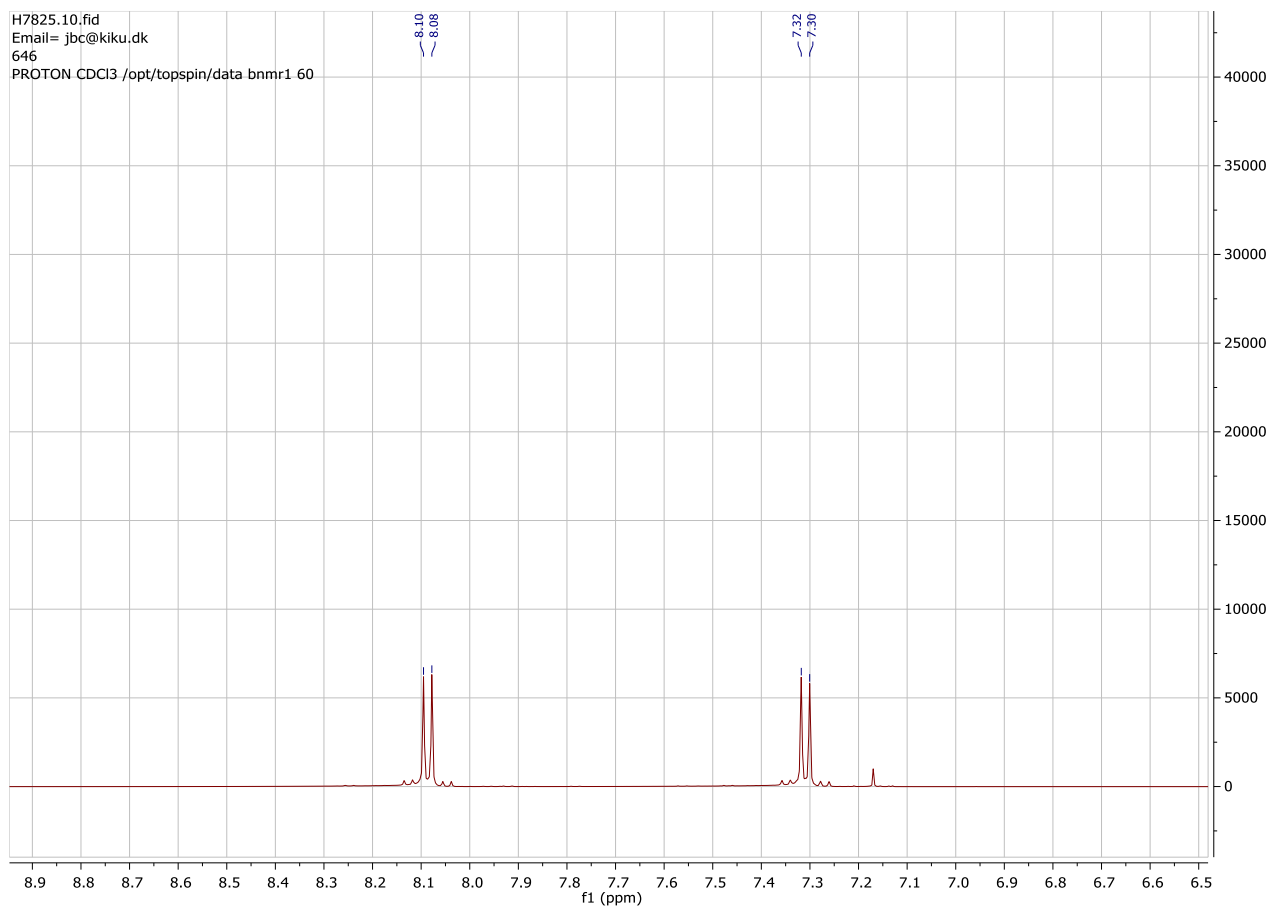

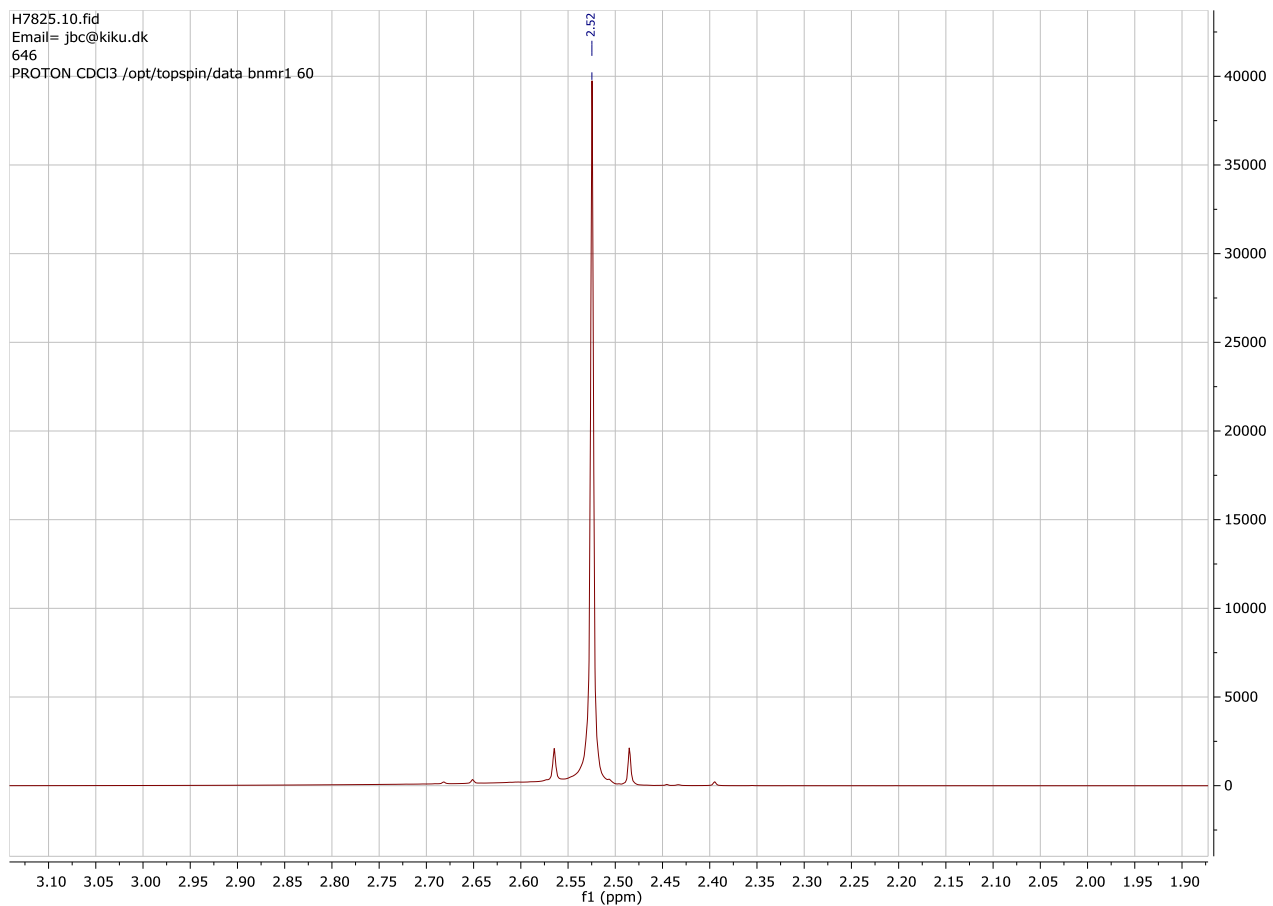

COSY

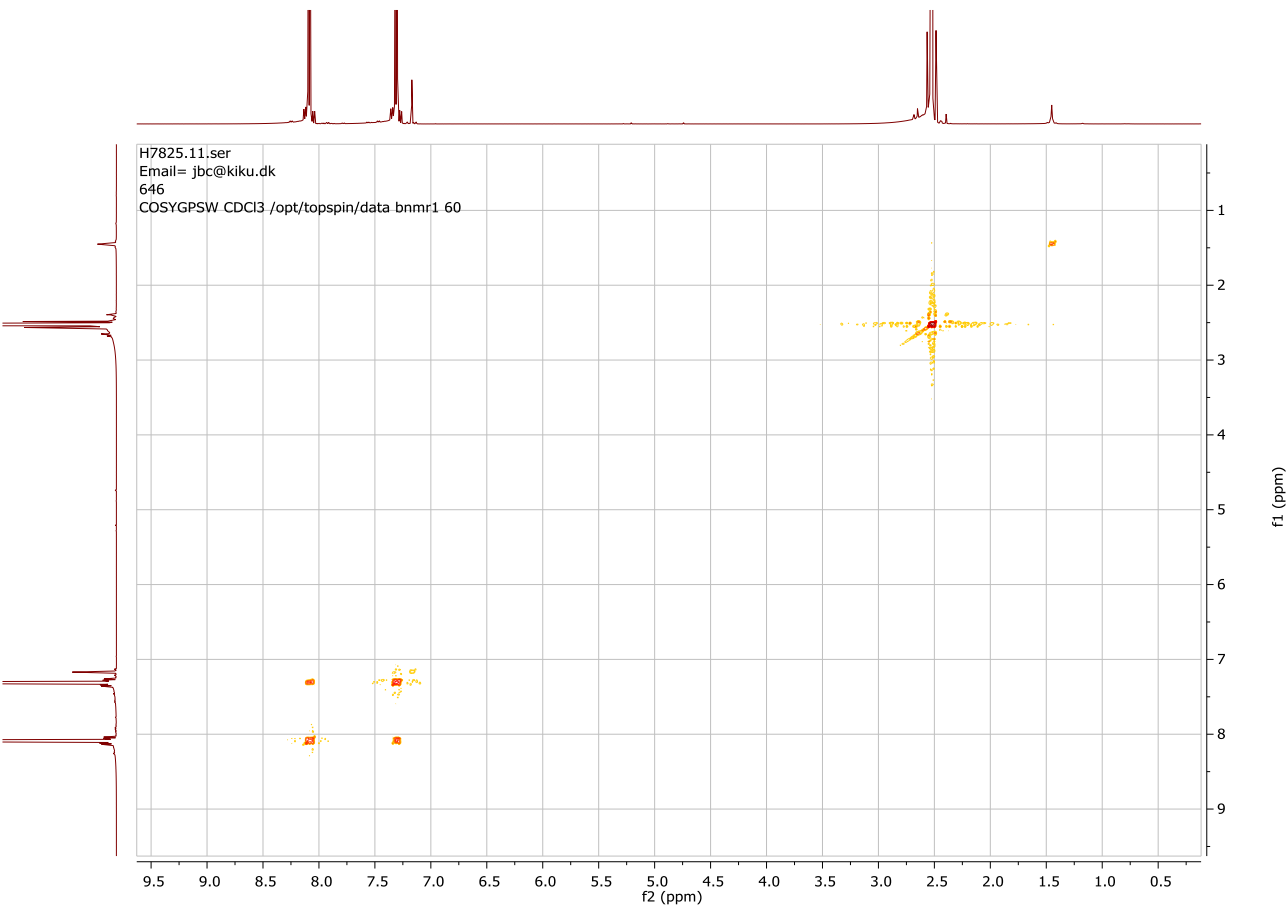

APC-<sup>13</sup>C

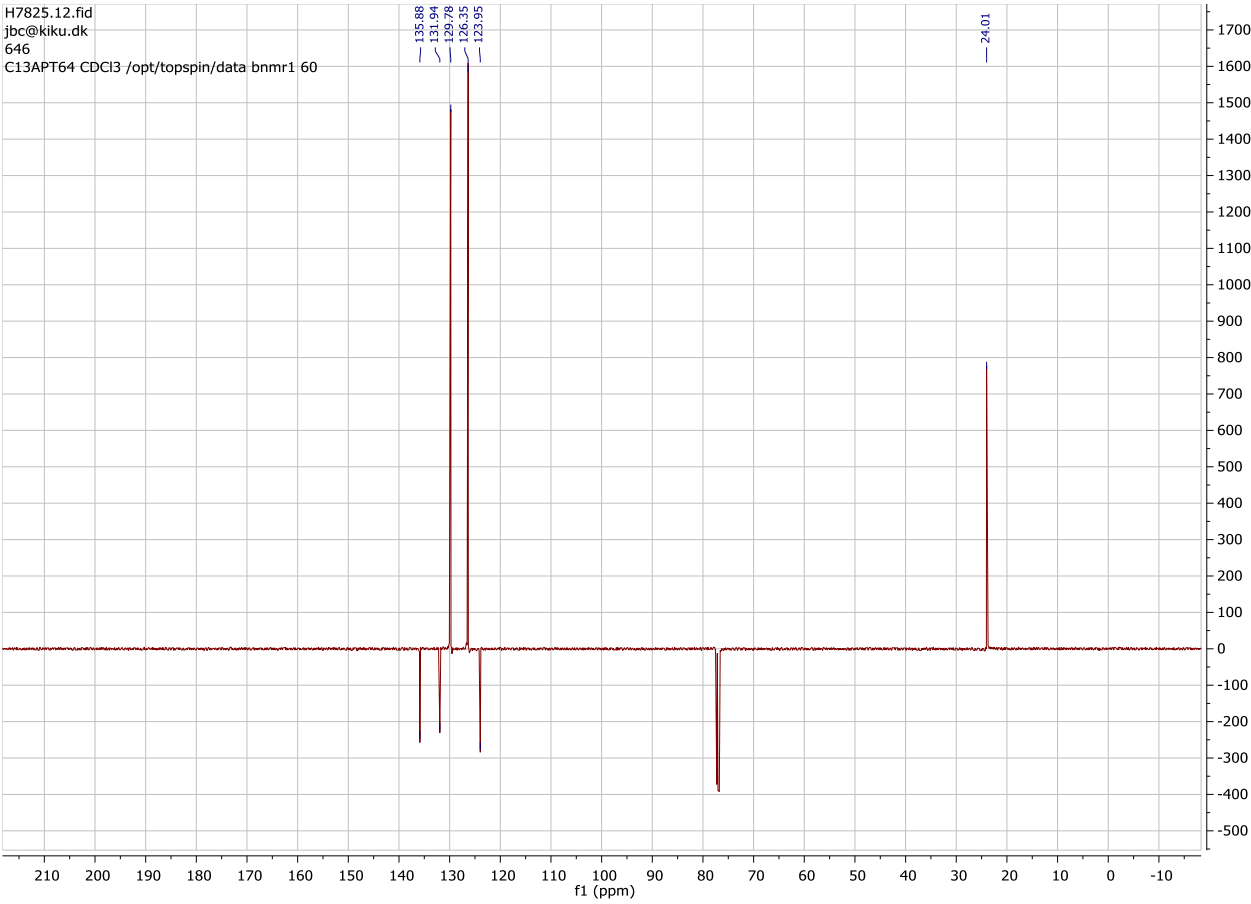

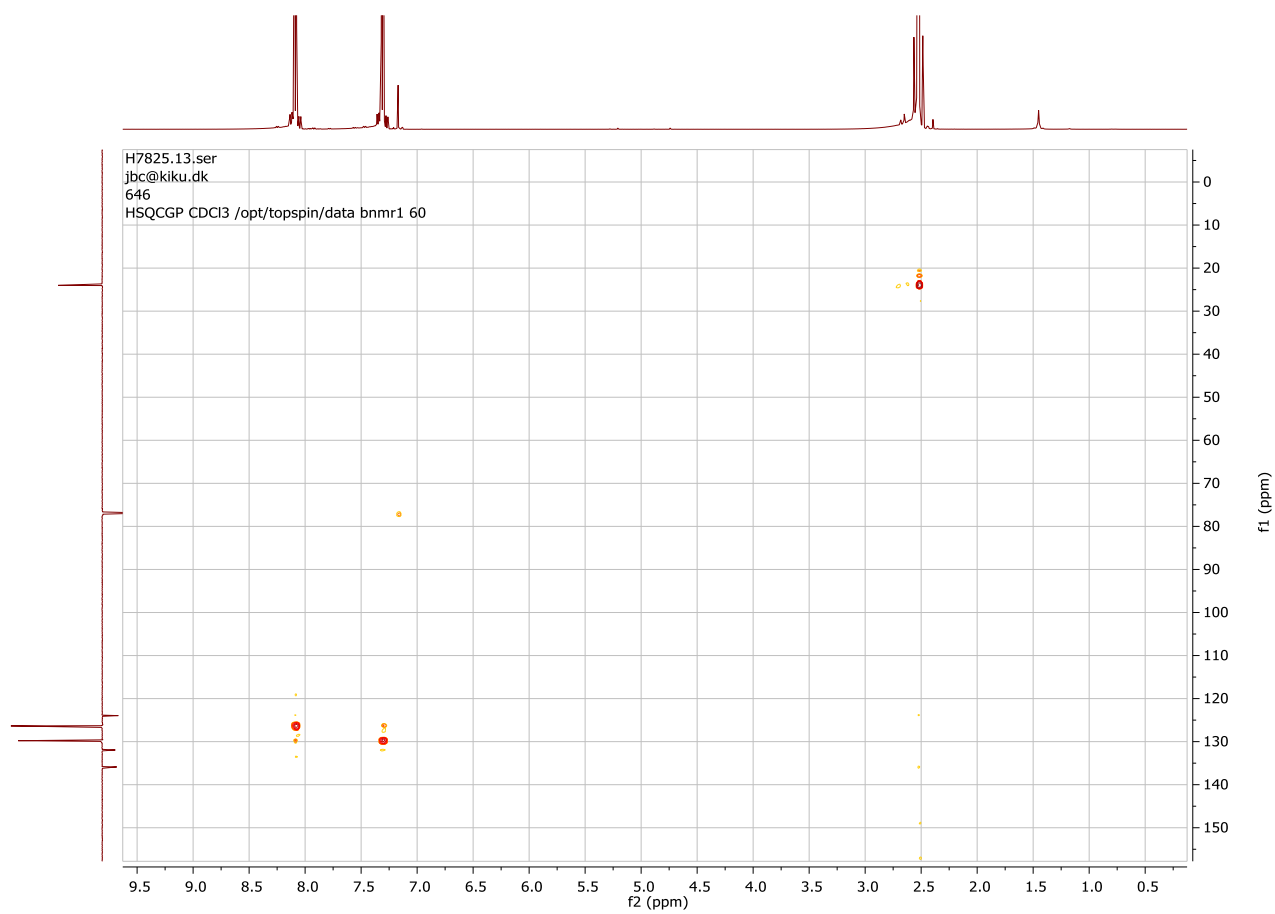

HSQC-NMR

NMR-spectra of compound **5** in CDCl<sub>3</sub>

<sup>1</sup>H-NMR

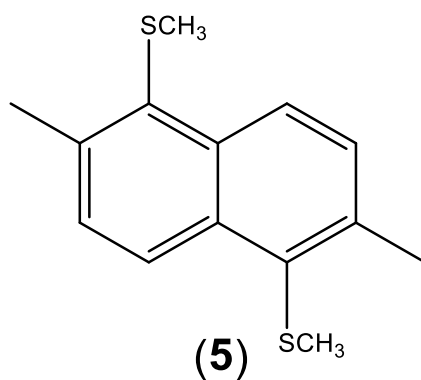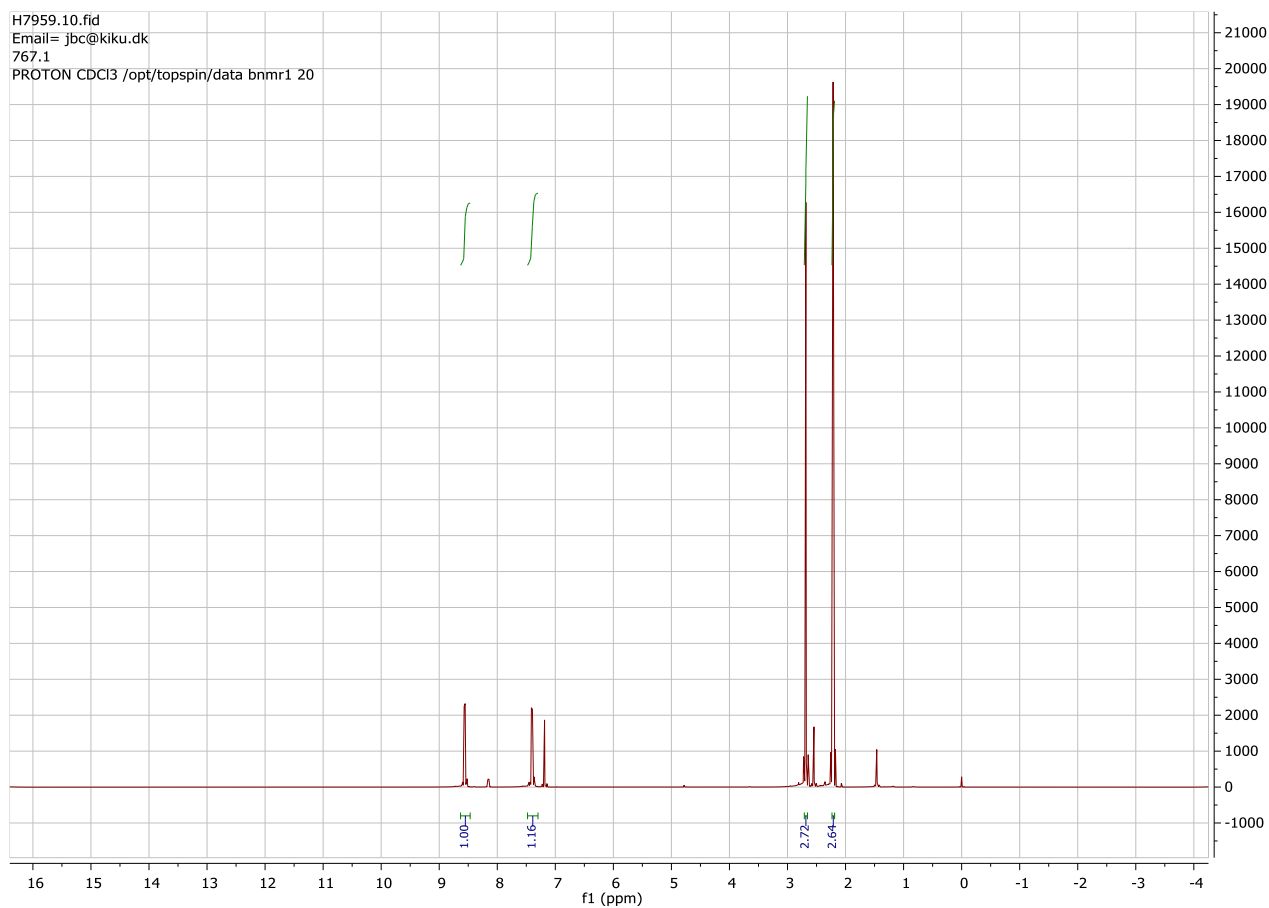

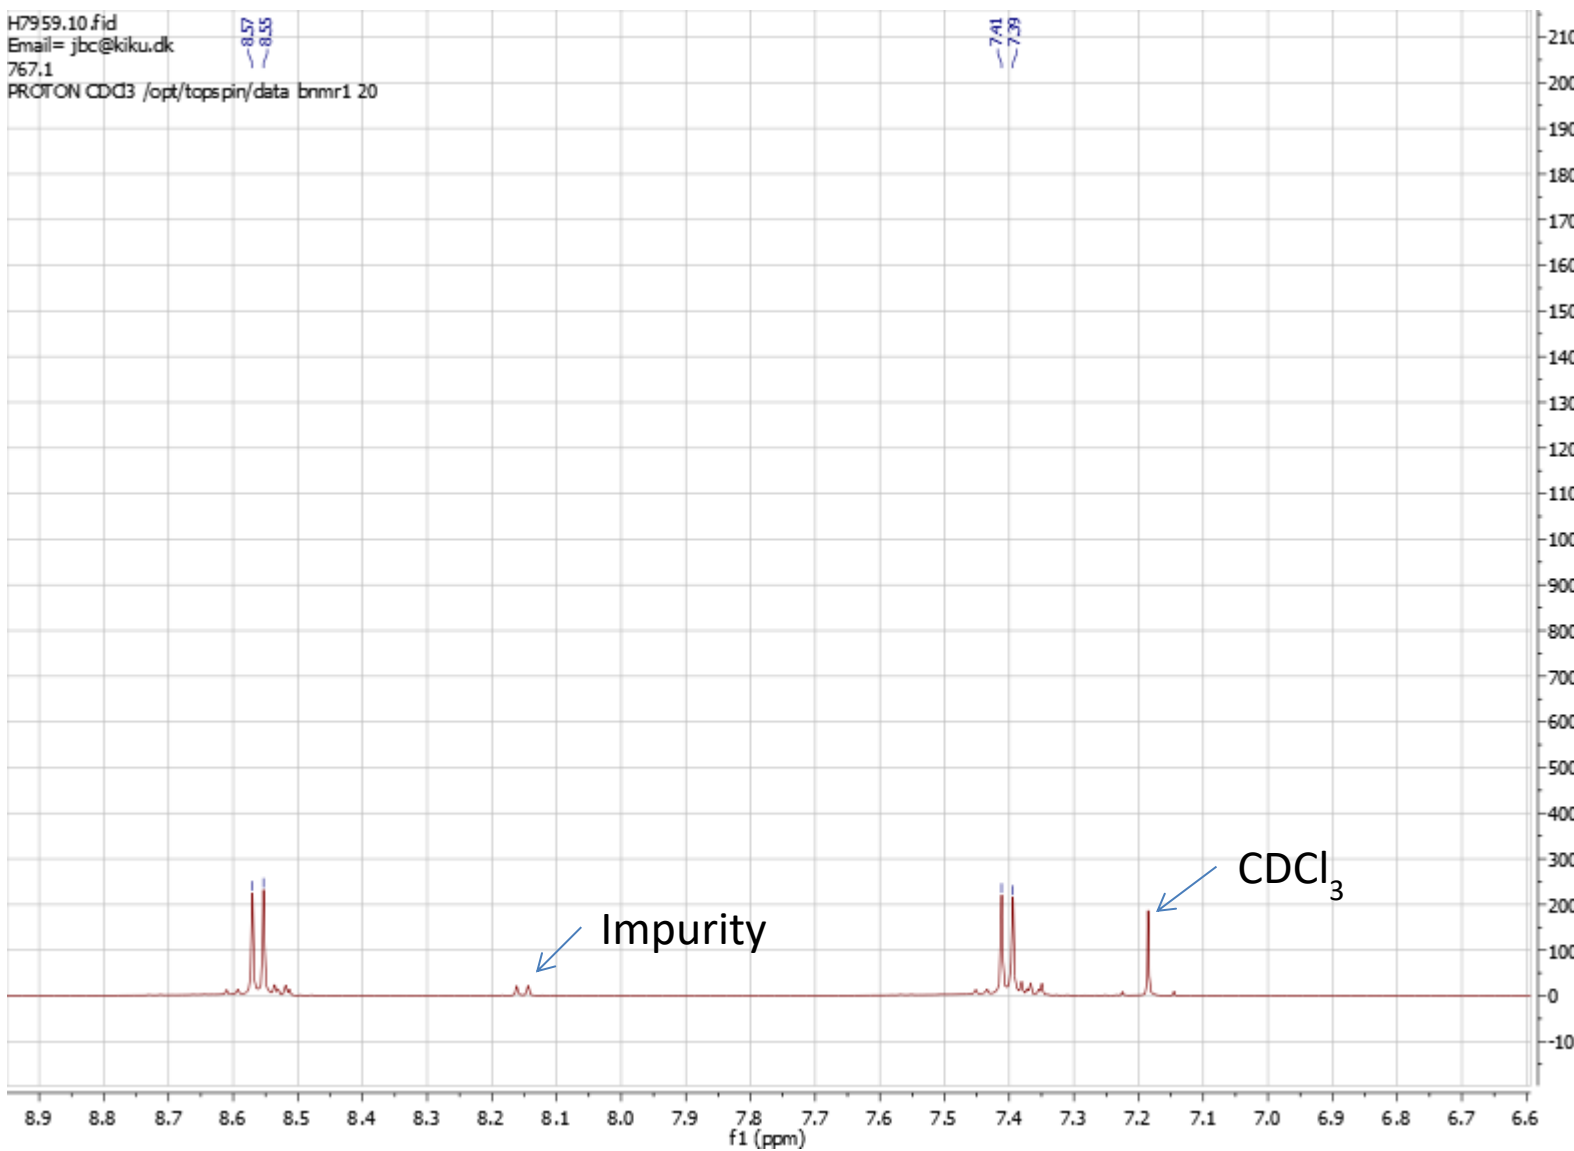

COSY-NMR

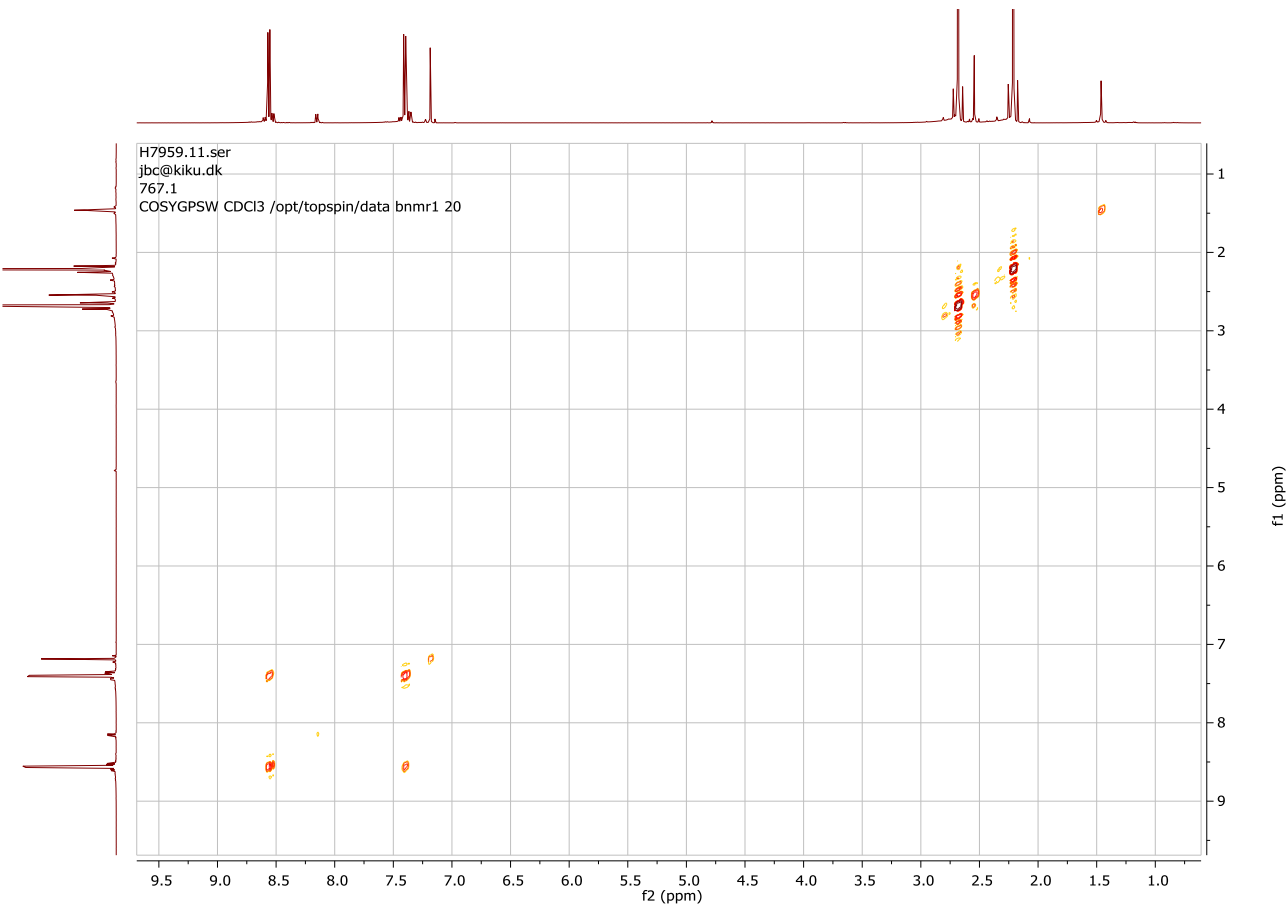

APT- $^{13}\text{C}$ -NMR

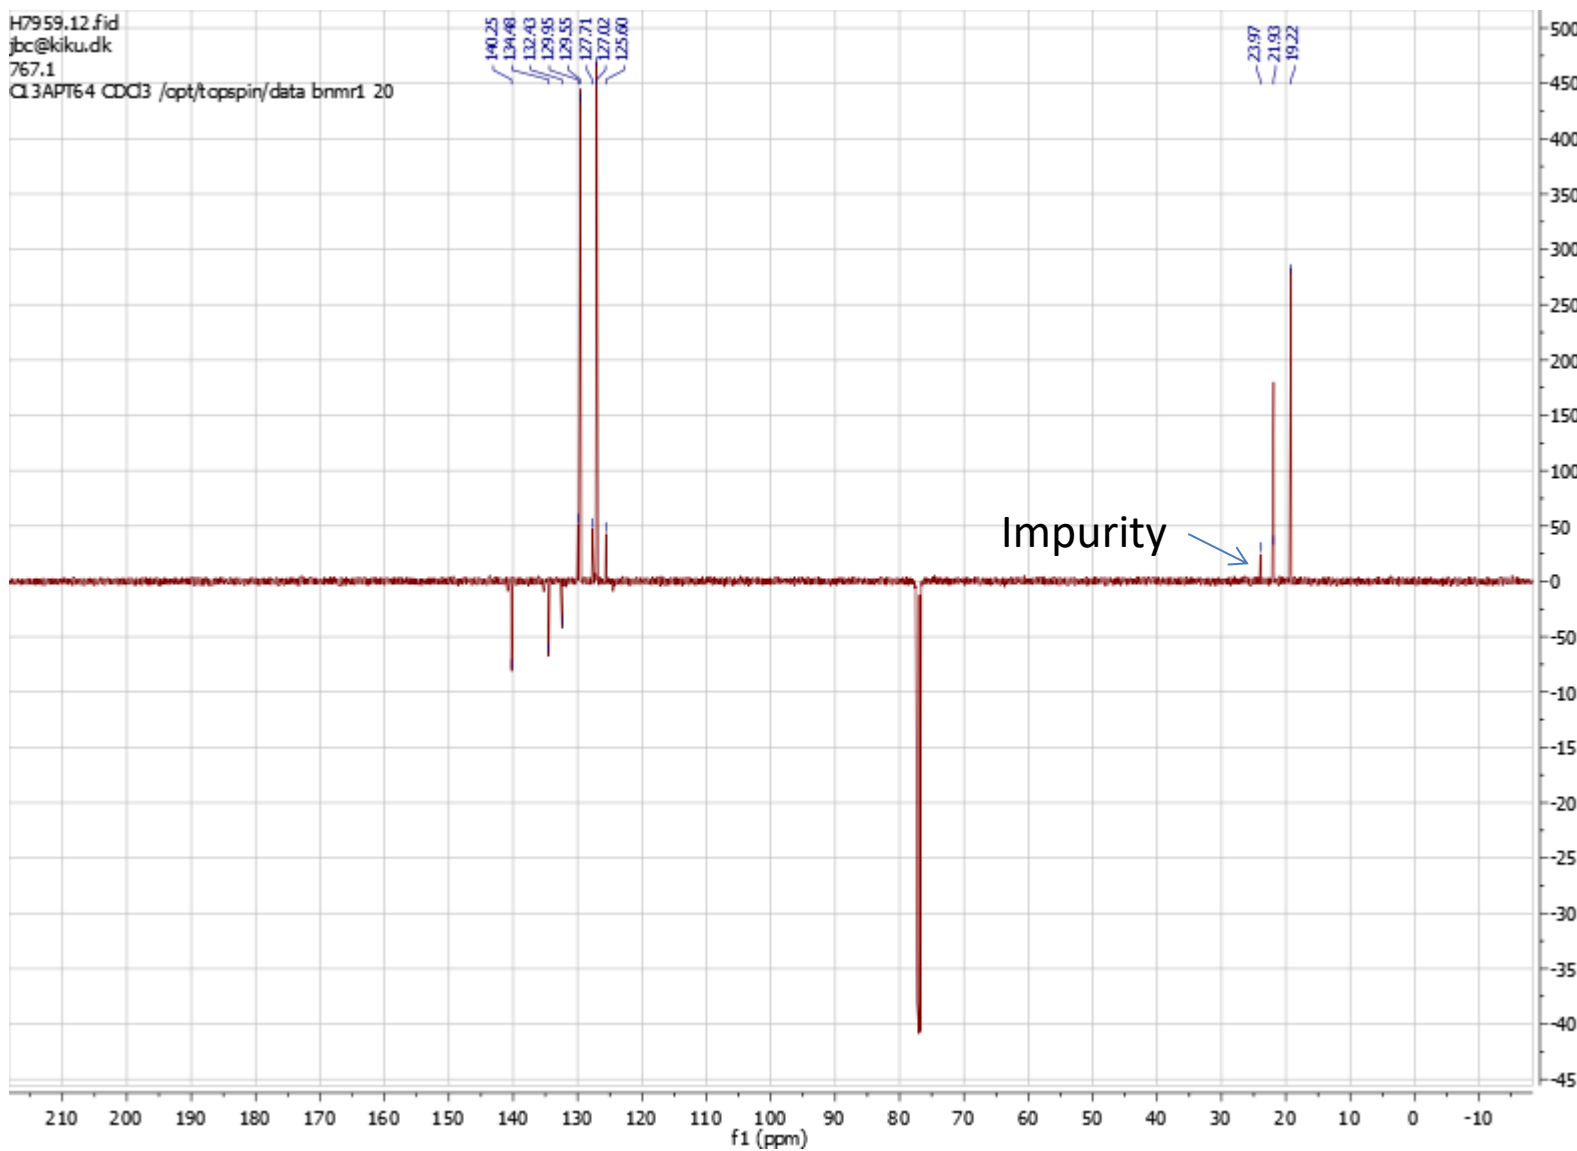

# HSQC-NMR

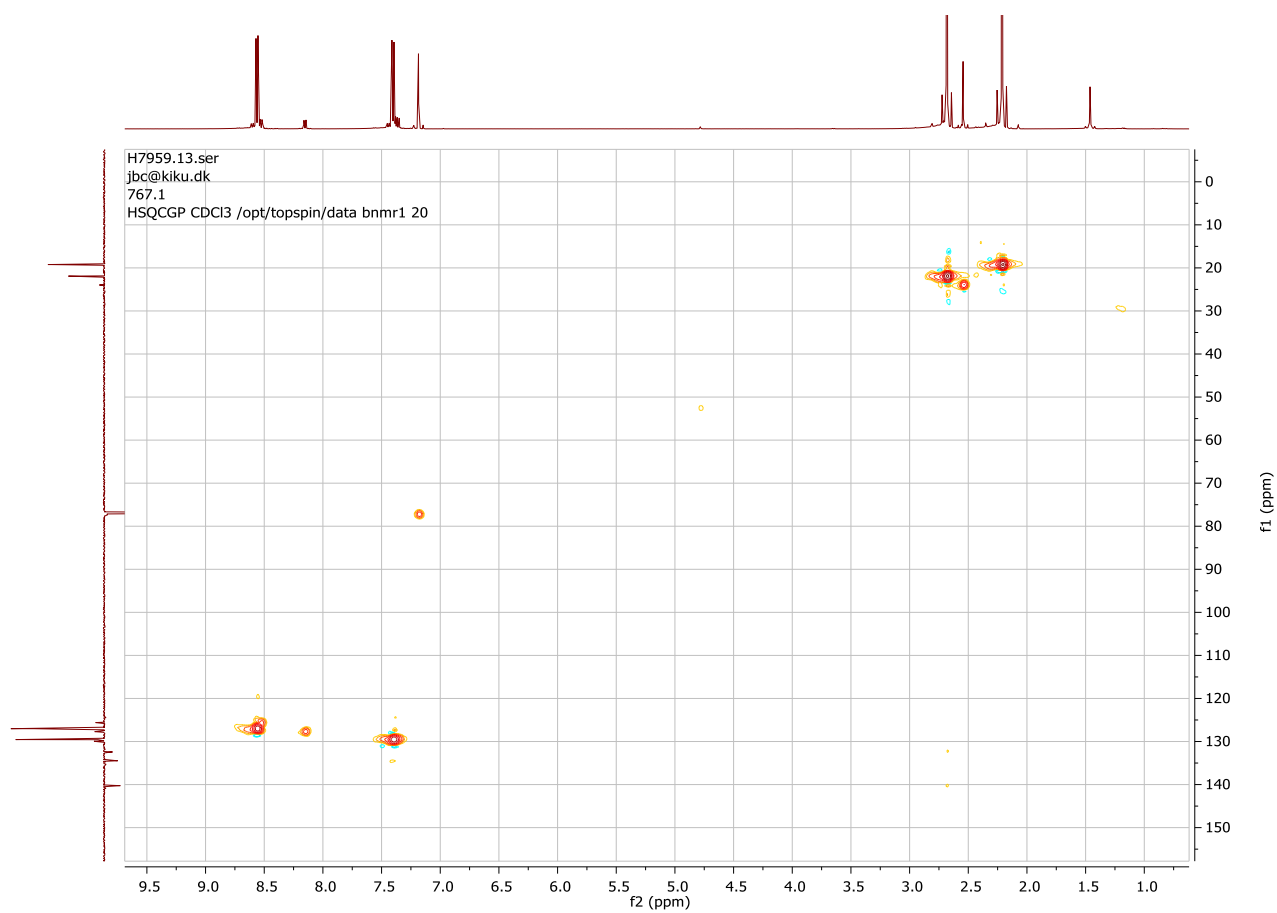

NMR-spectra of compound **6** in CDCl<sub>3</sub>

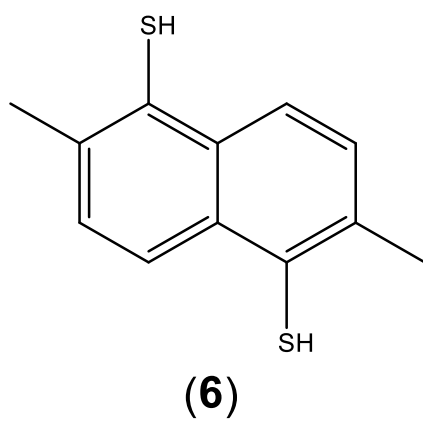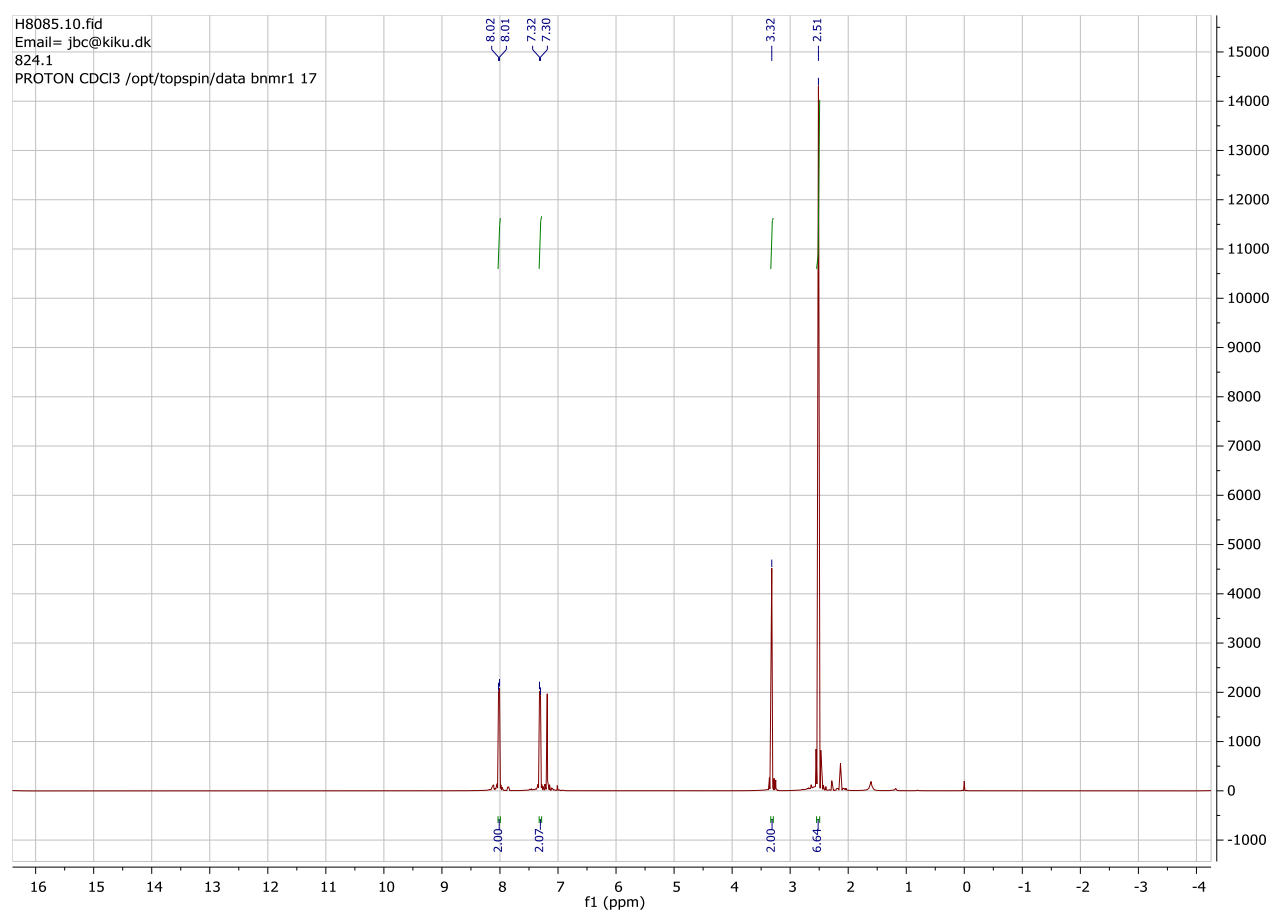

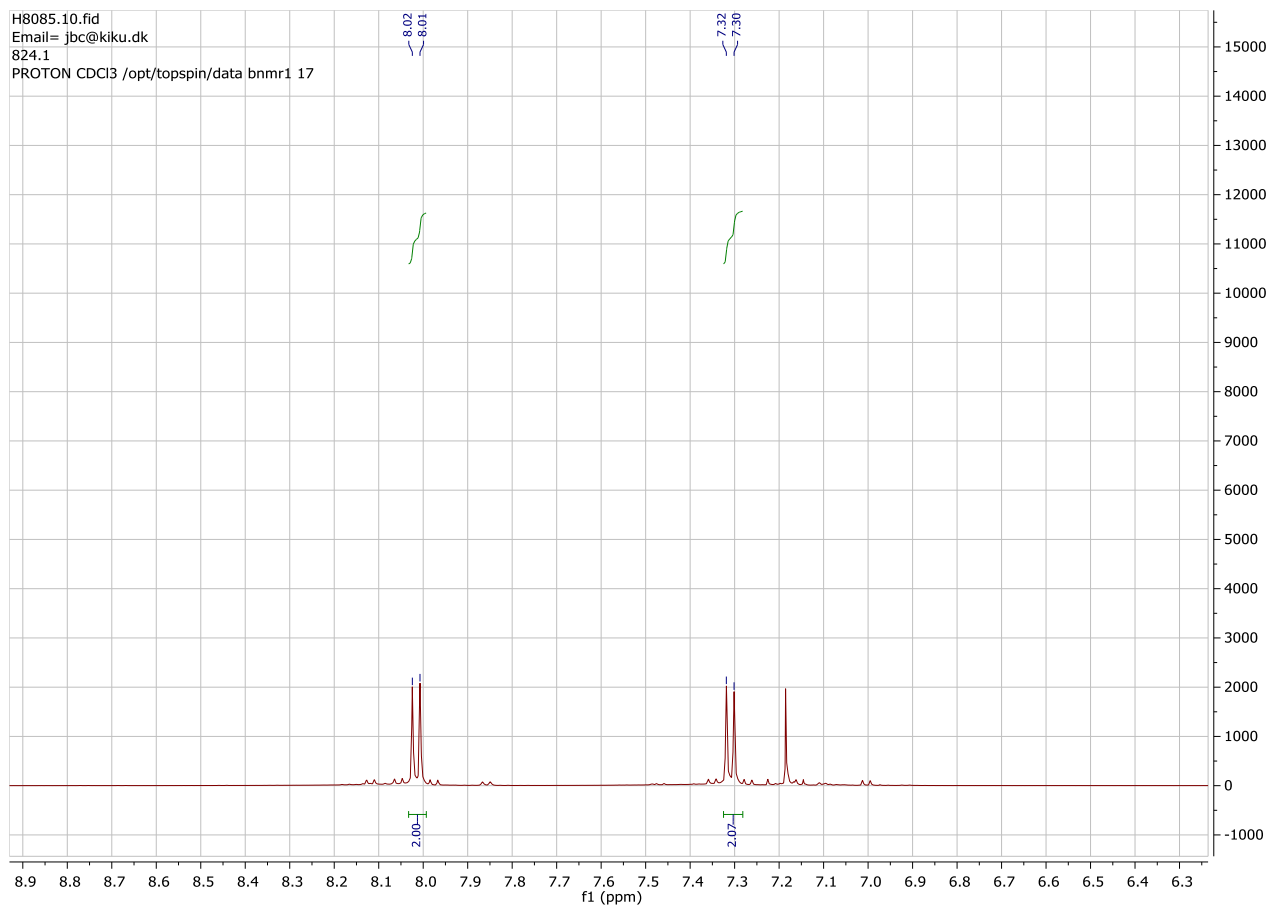

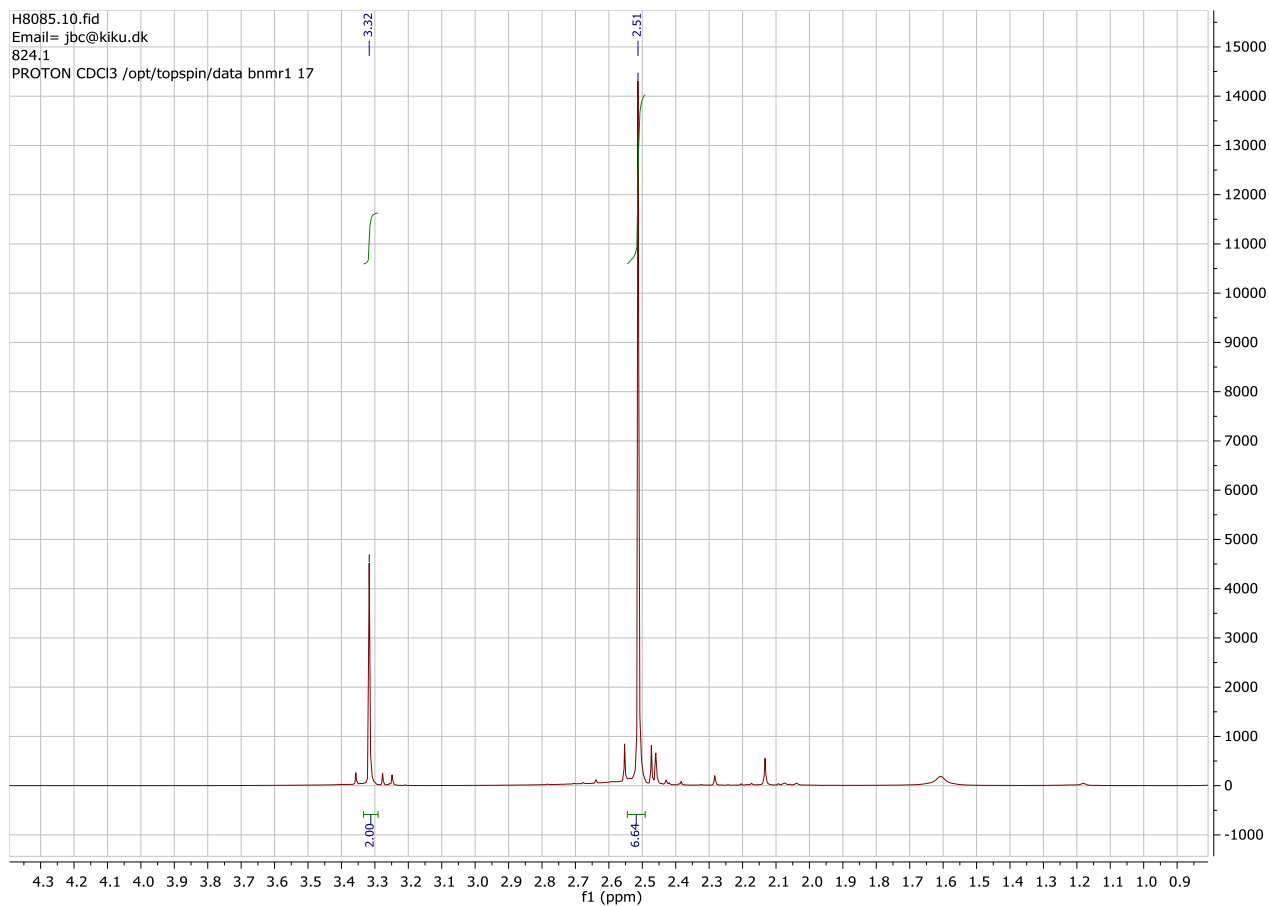

COSY-NMR

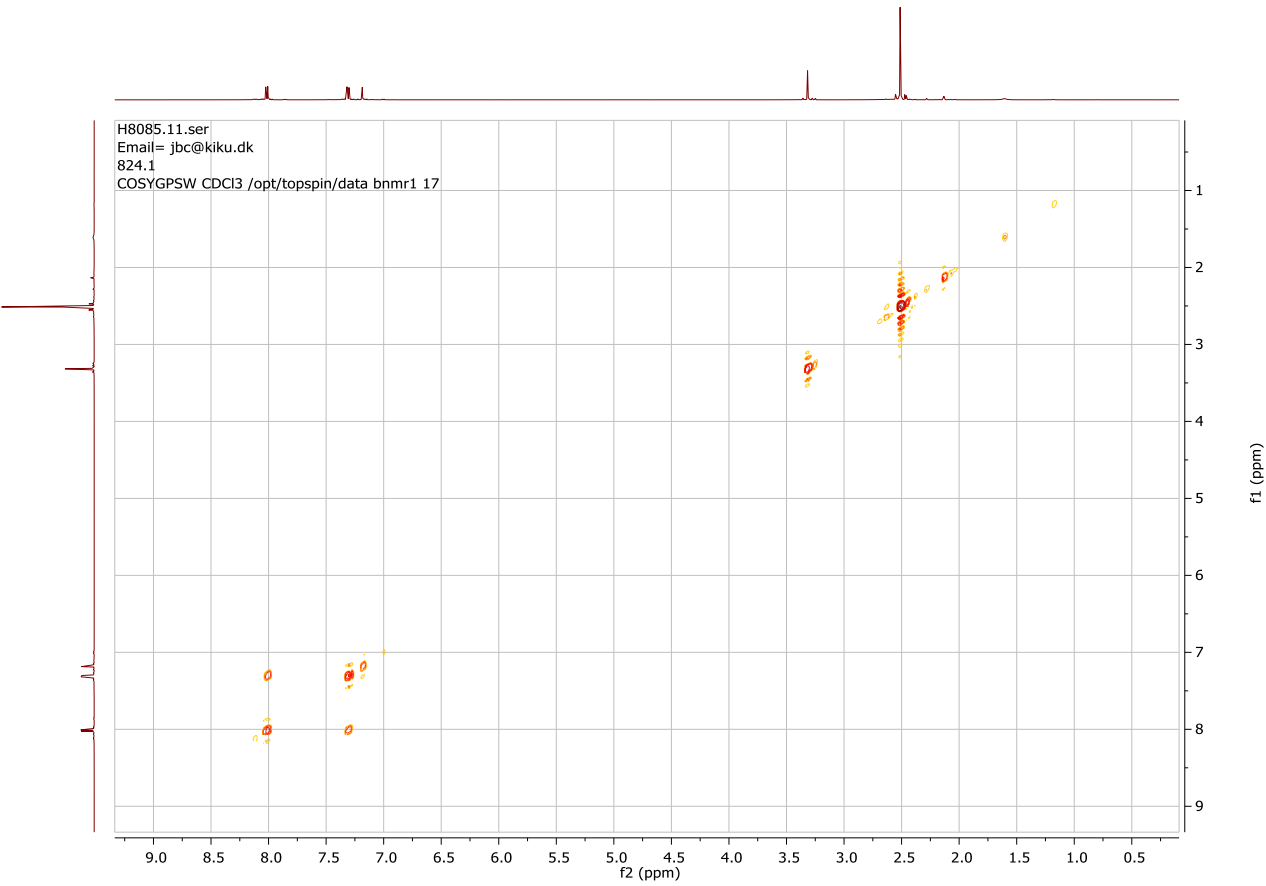

# APT-<sup>13</sup>C-NMR

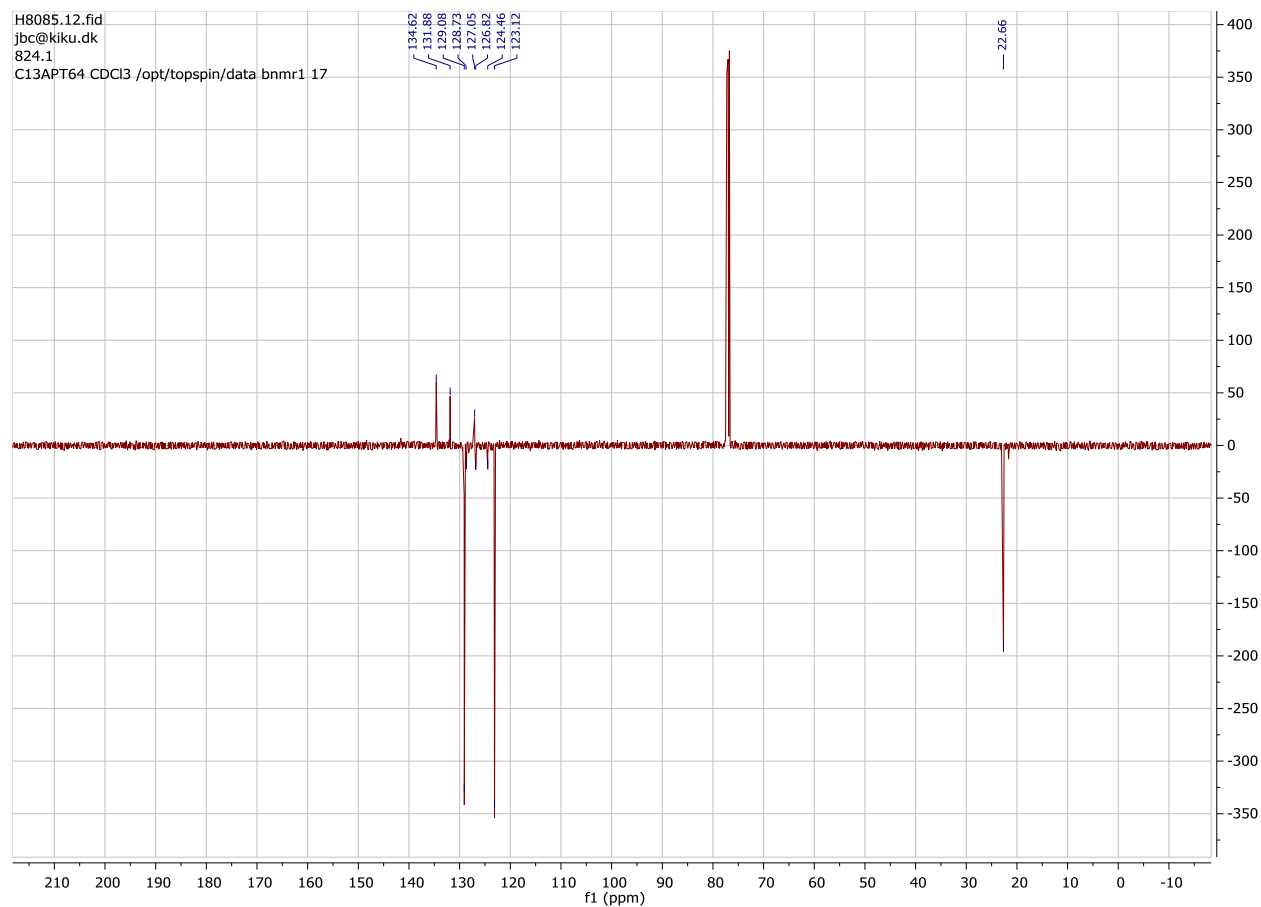

HSQC-NMR

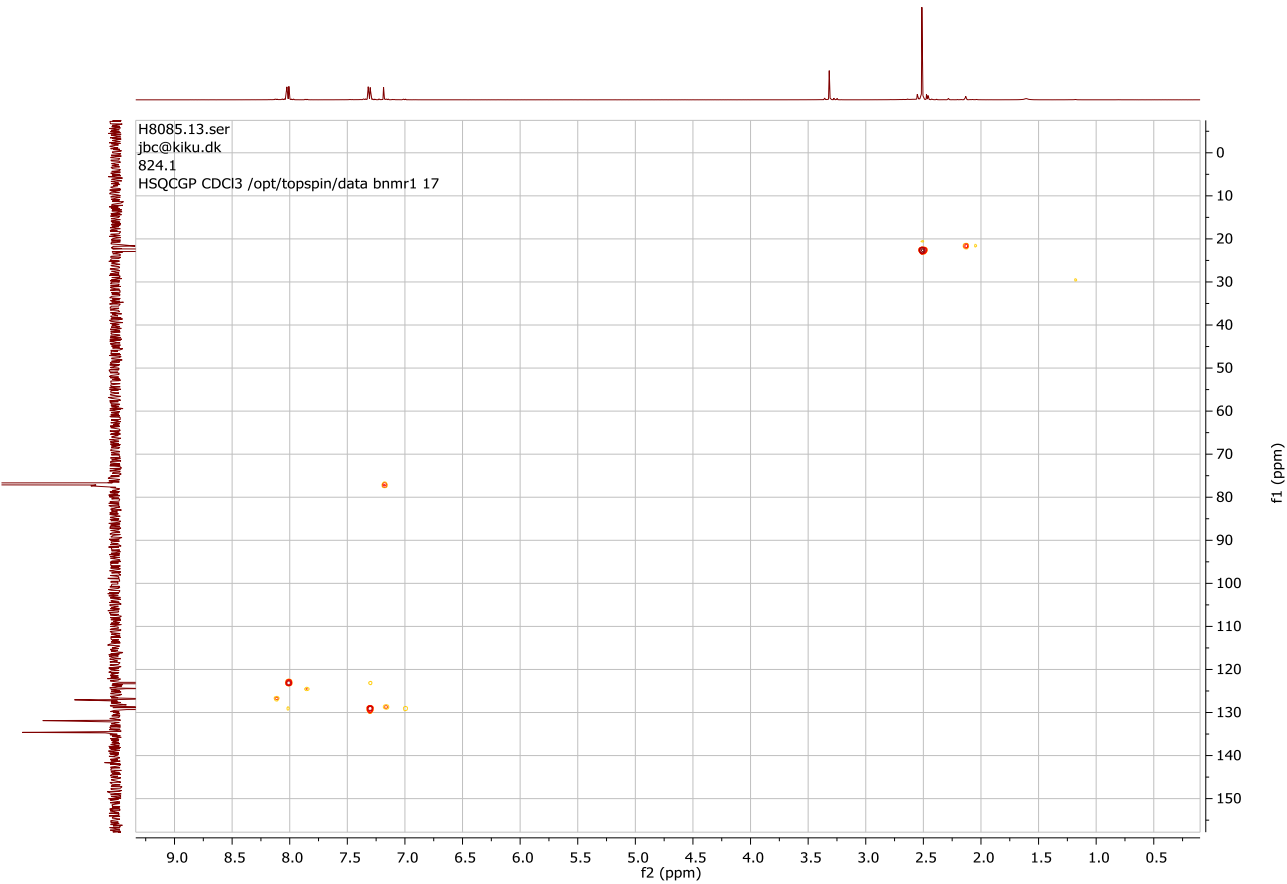

NMR of compound **7** in CDCl<sub>3</sub>

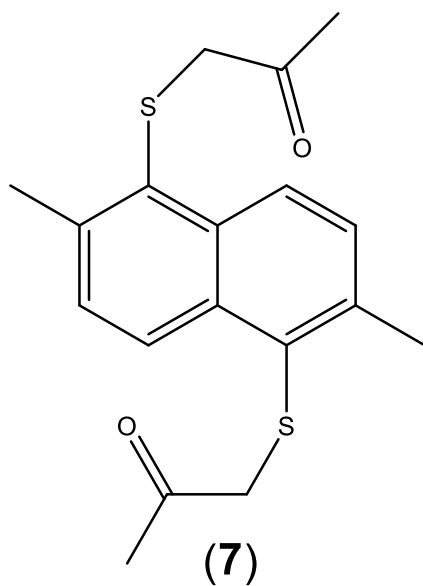

<sup>1</sup>H-NMR

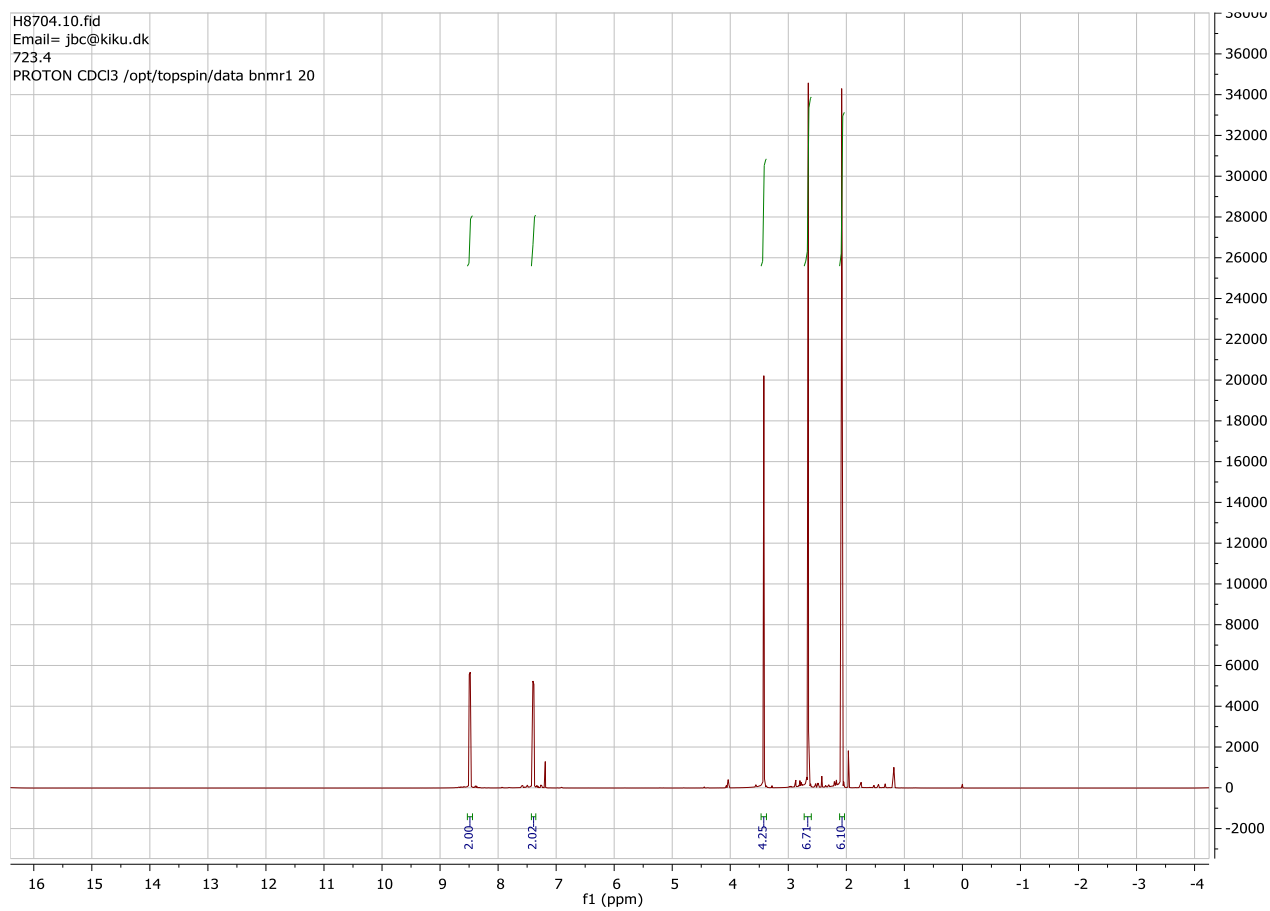

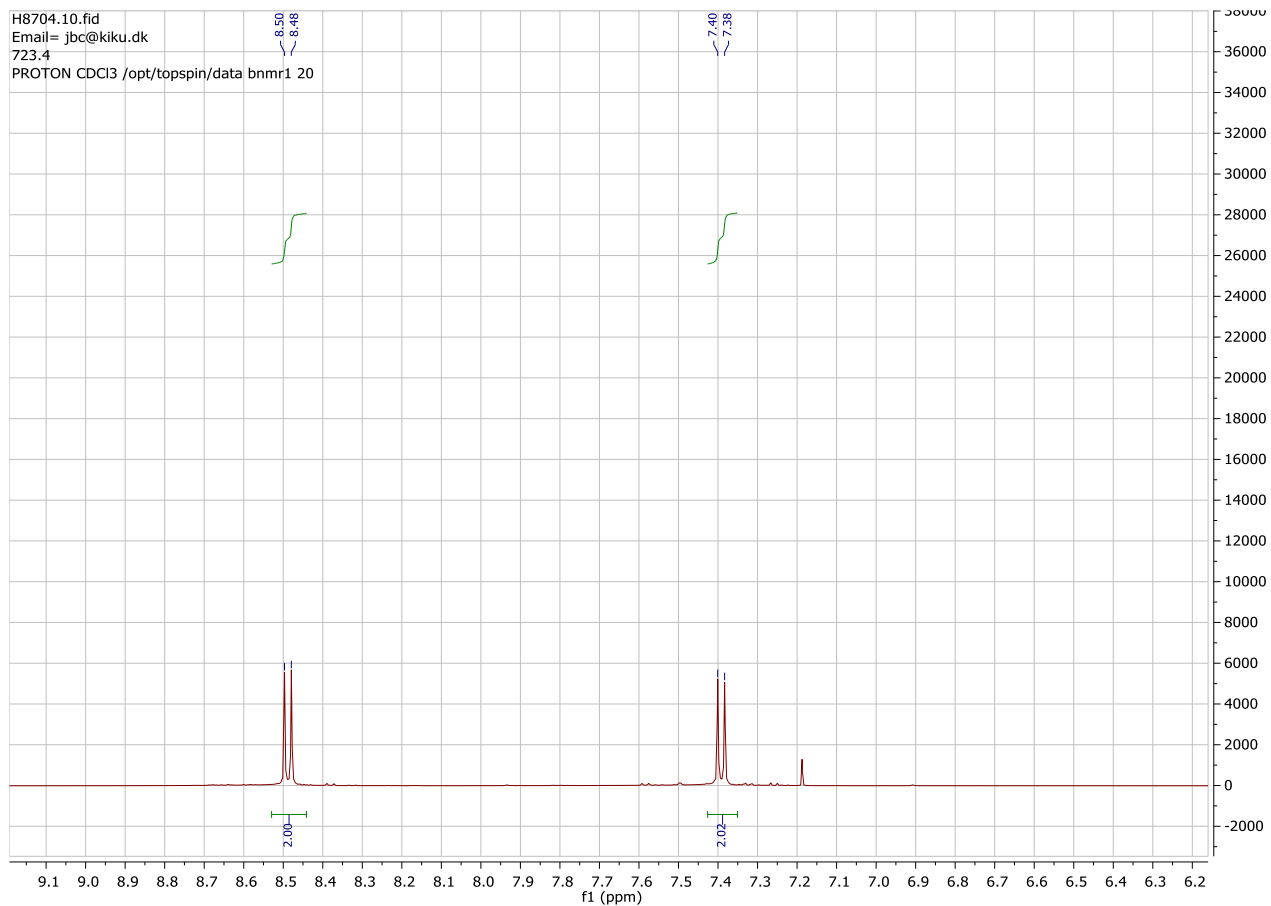

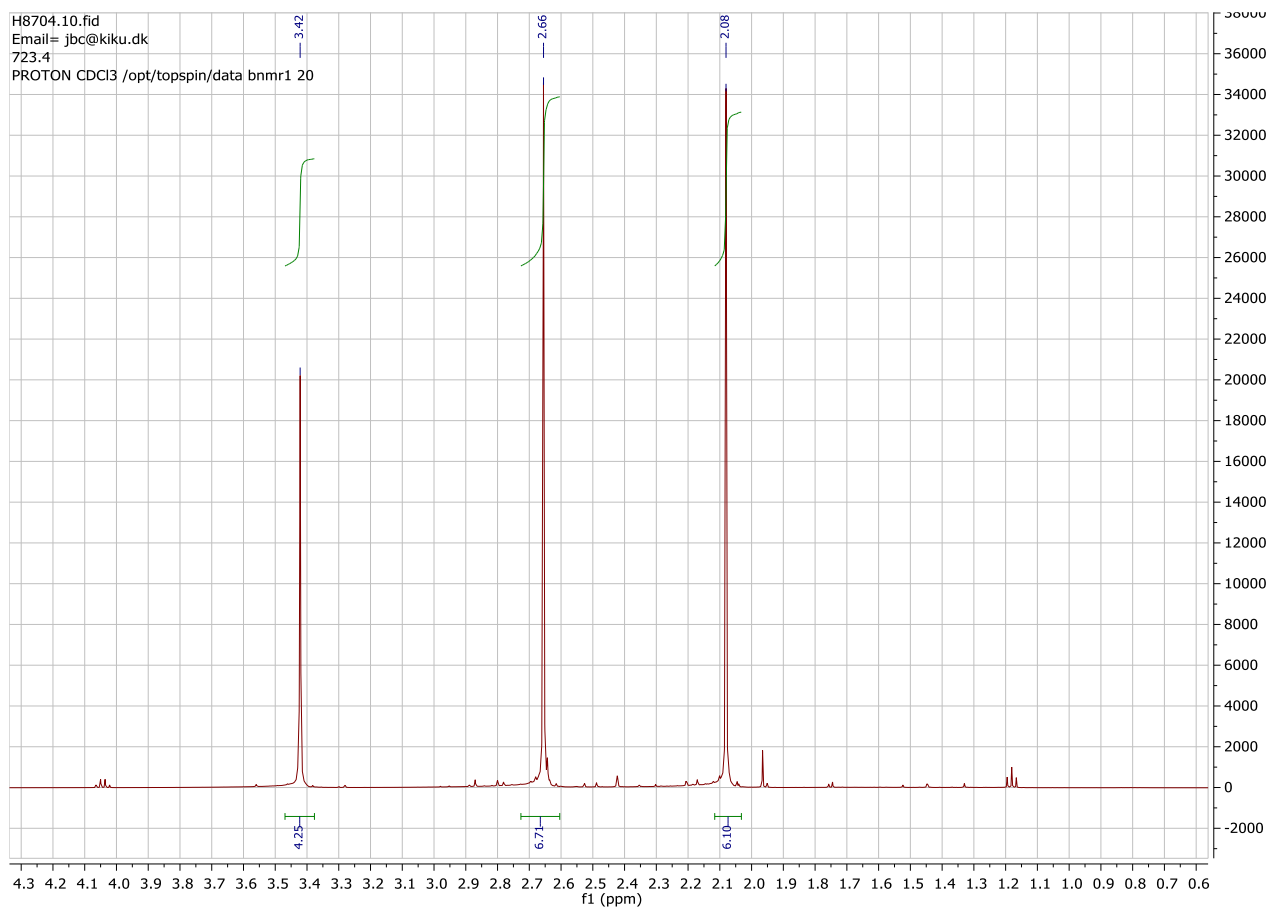

COSY-NMR

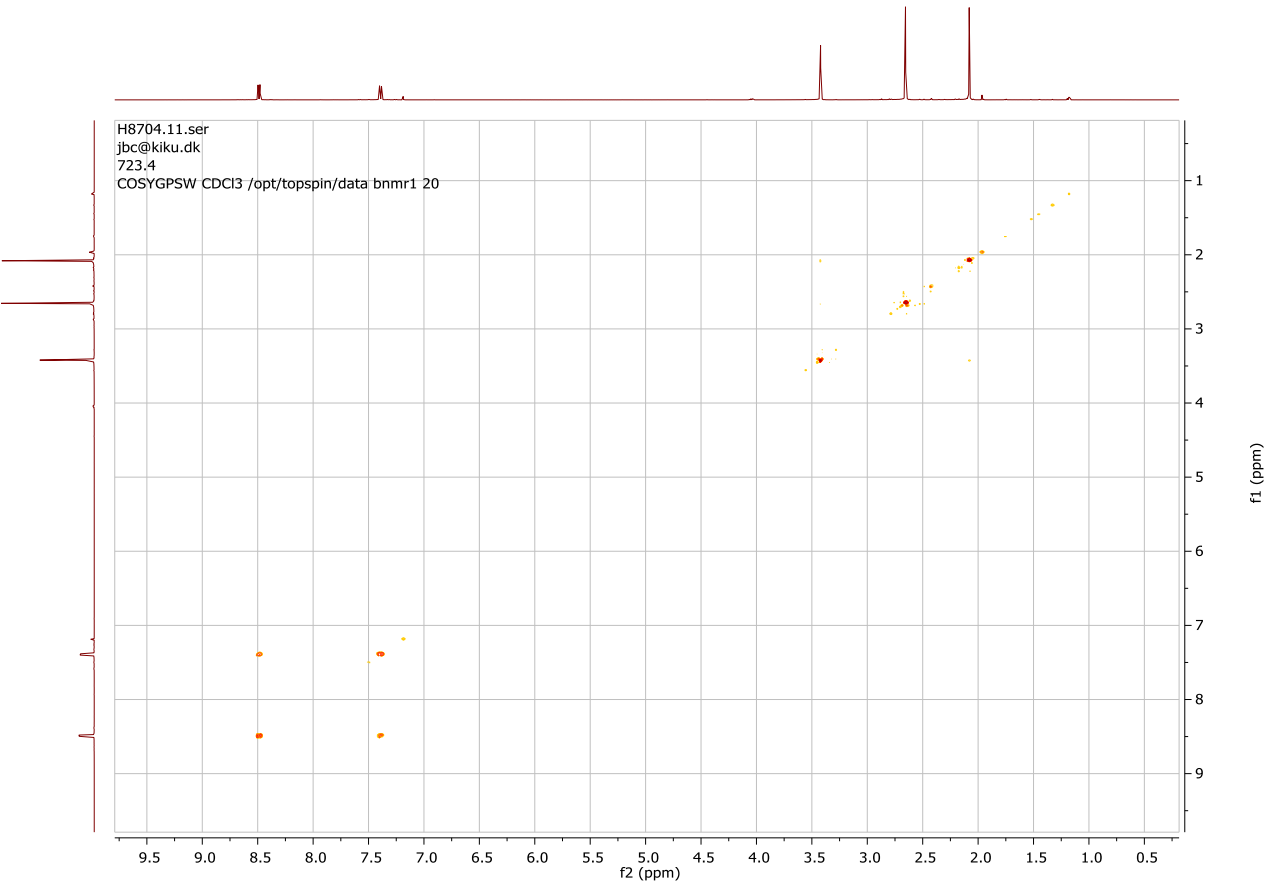

# APT-<sup>13</sup>C-NMR

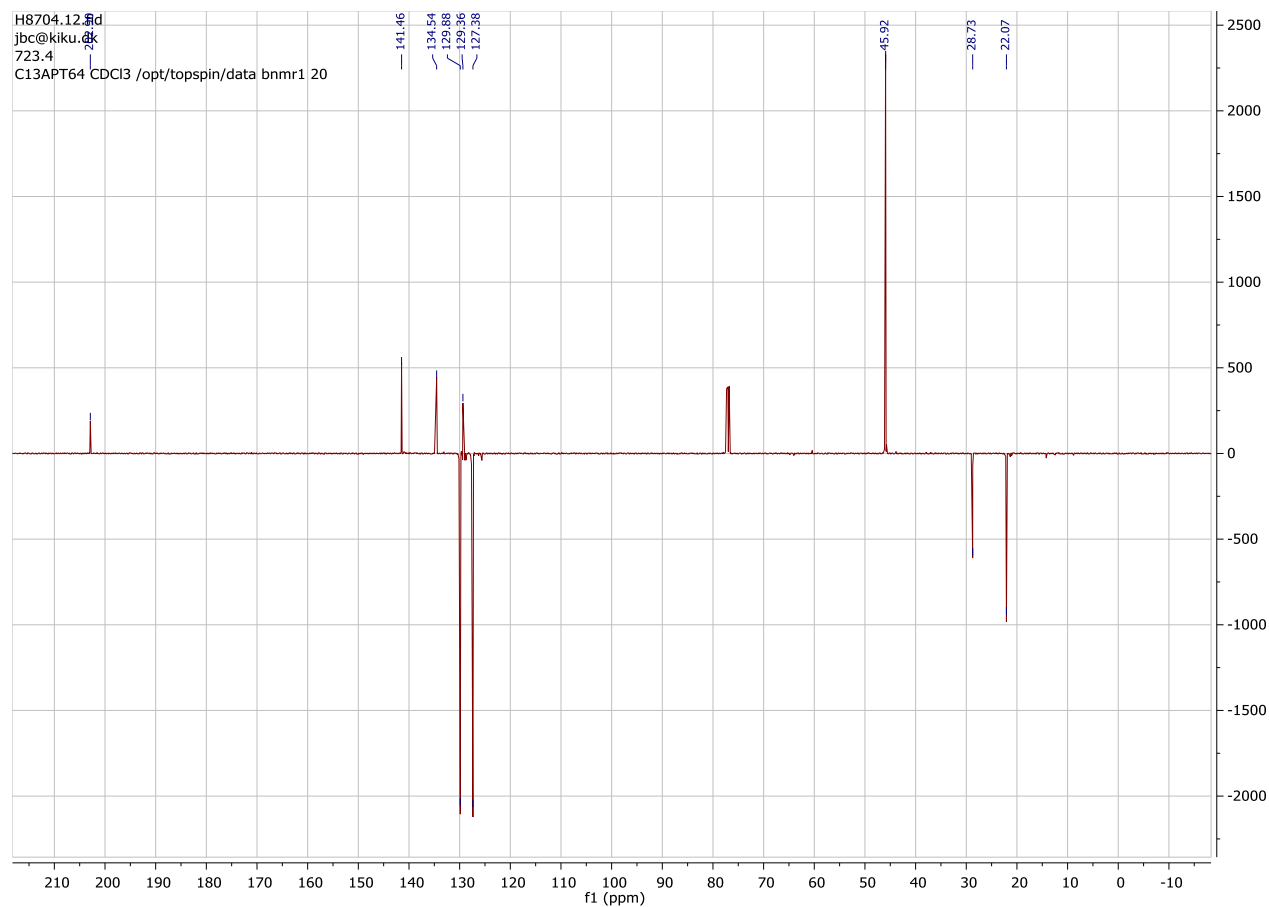

HSQC-NMR

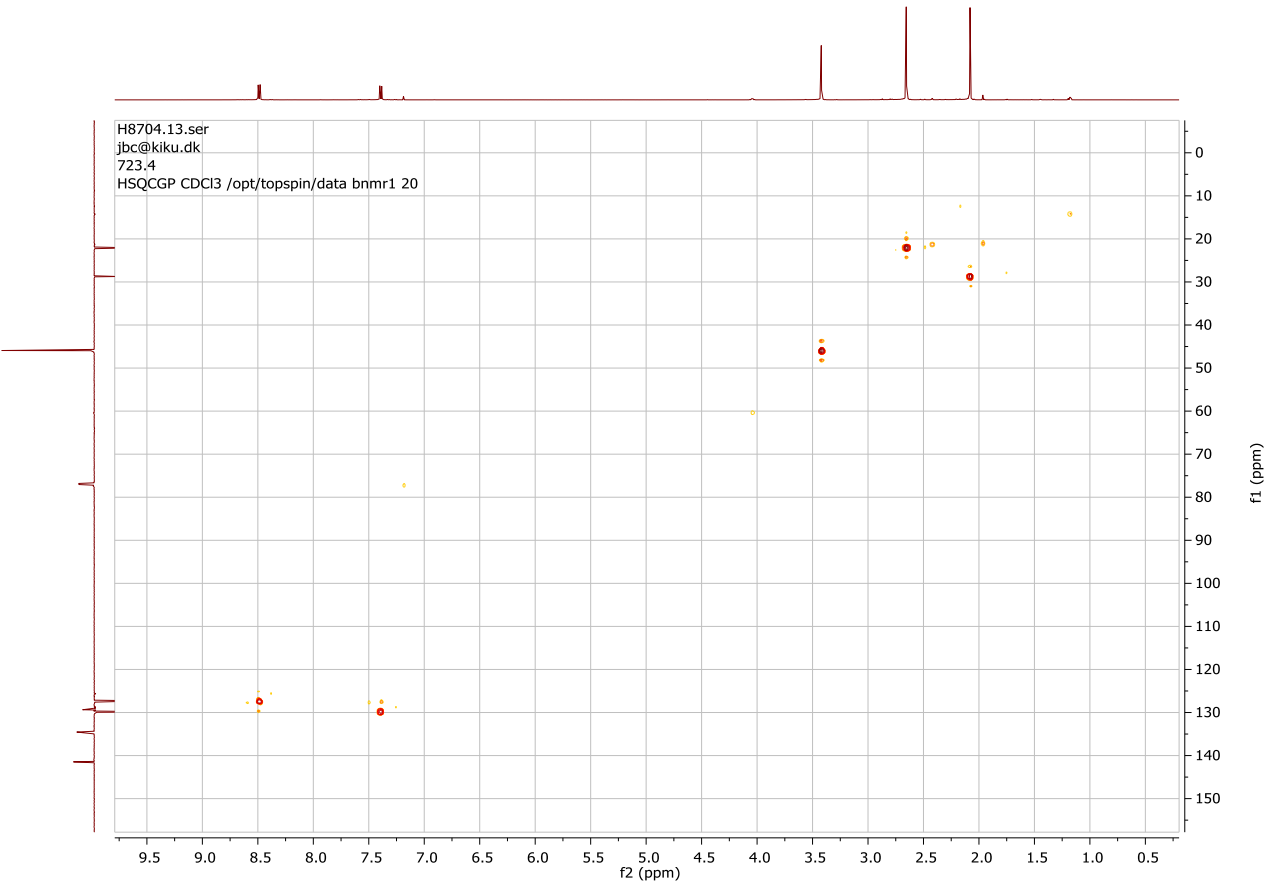

NMR-data on compound **2** in CS<sub>2</sub> with a CDCl<sub>3</sub>-lock tube

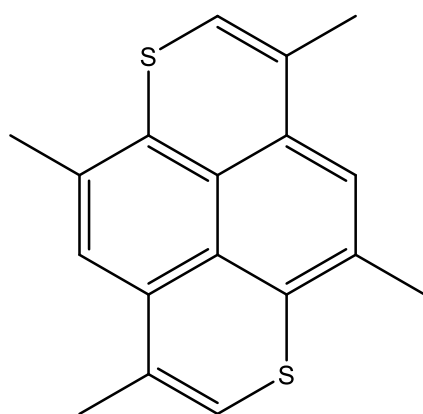

**(2)**

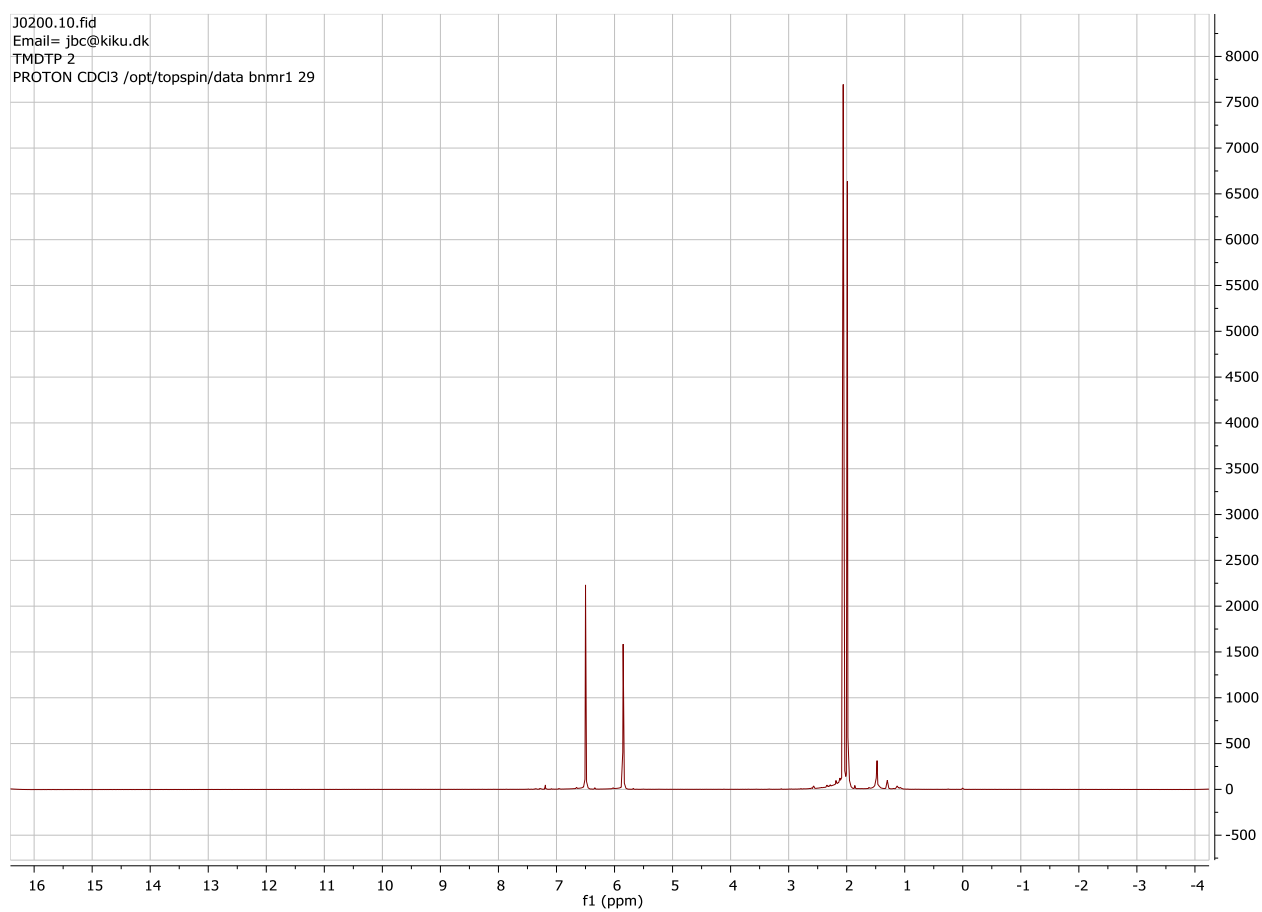

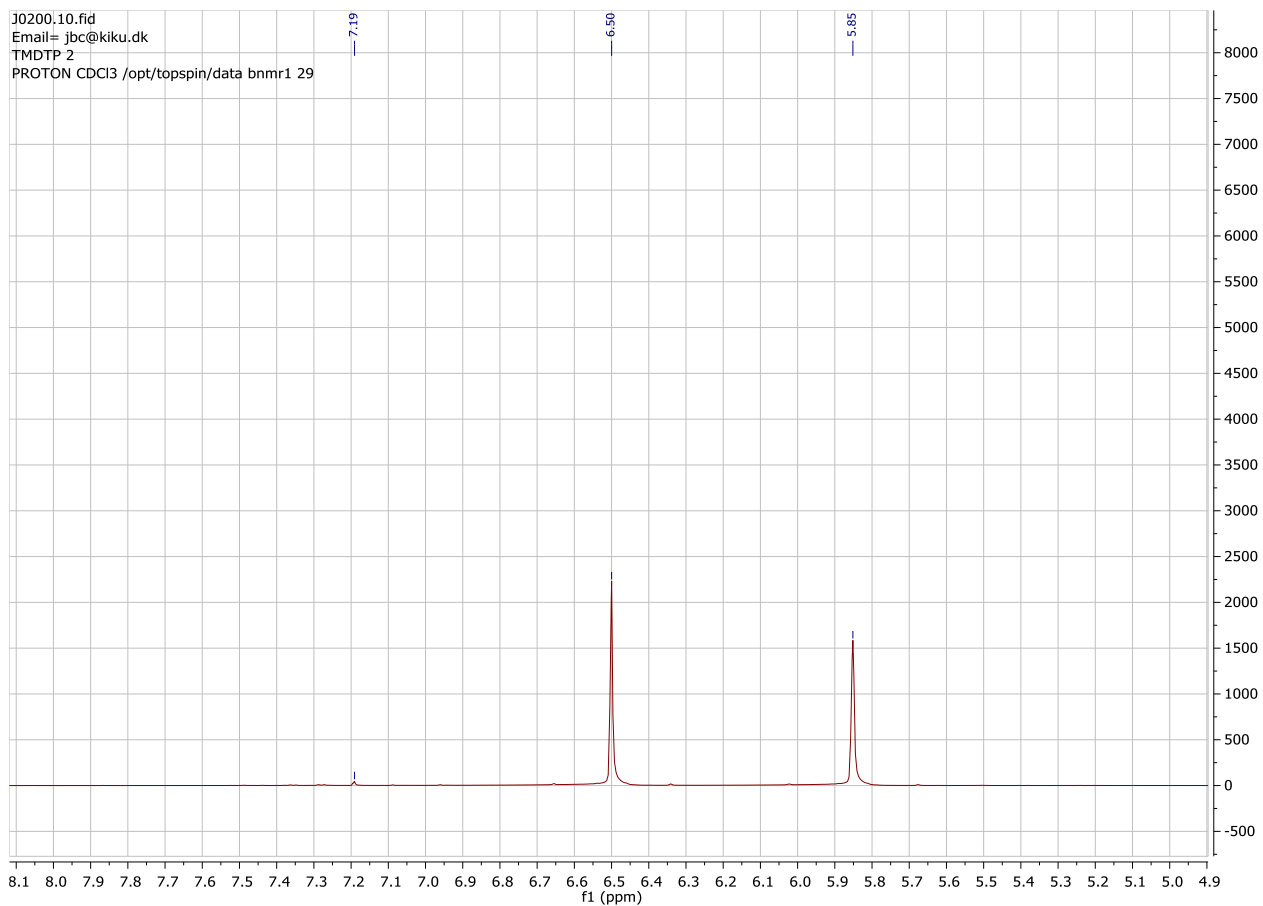

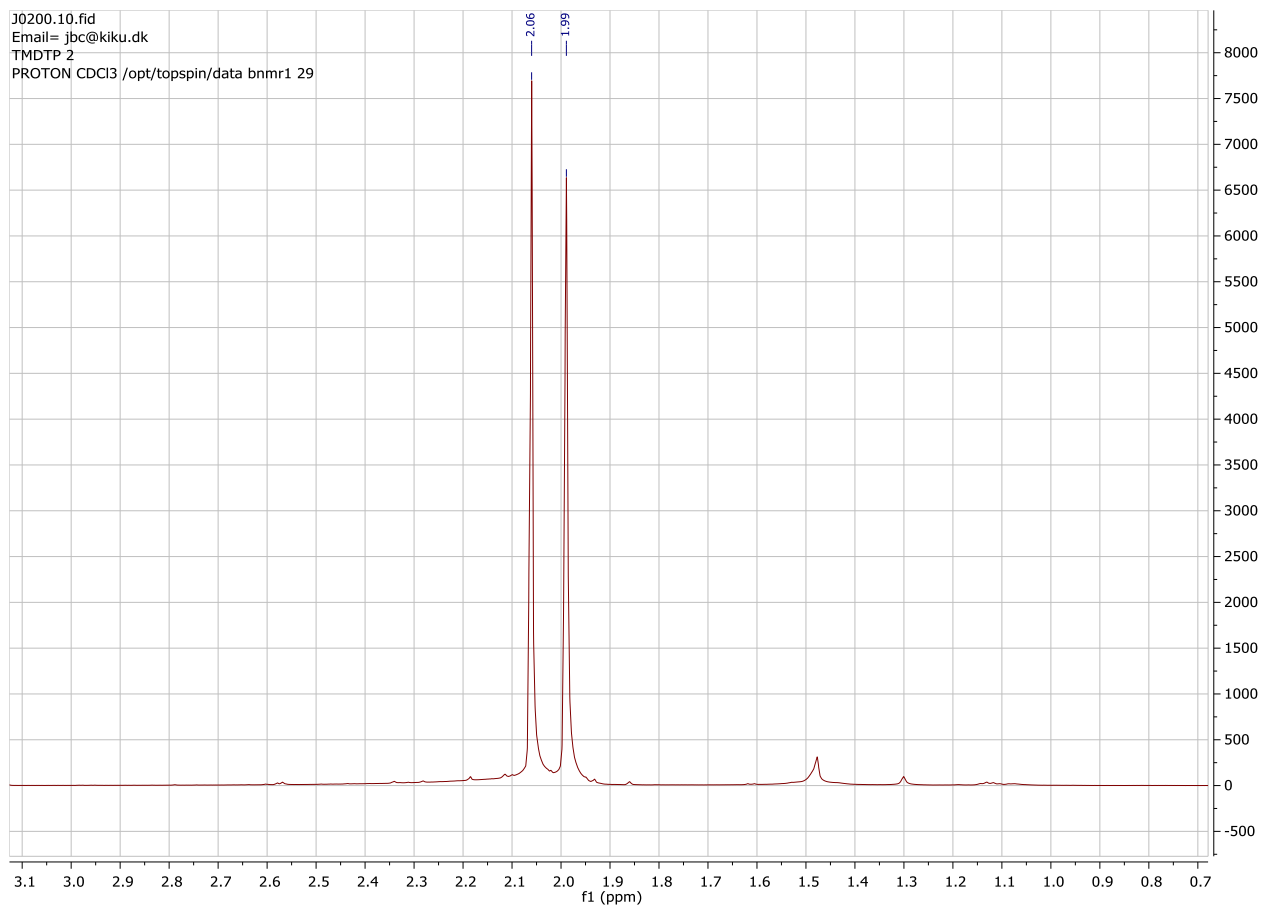

COSY-NMR

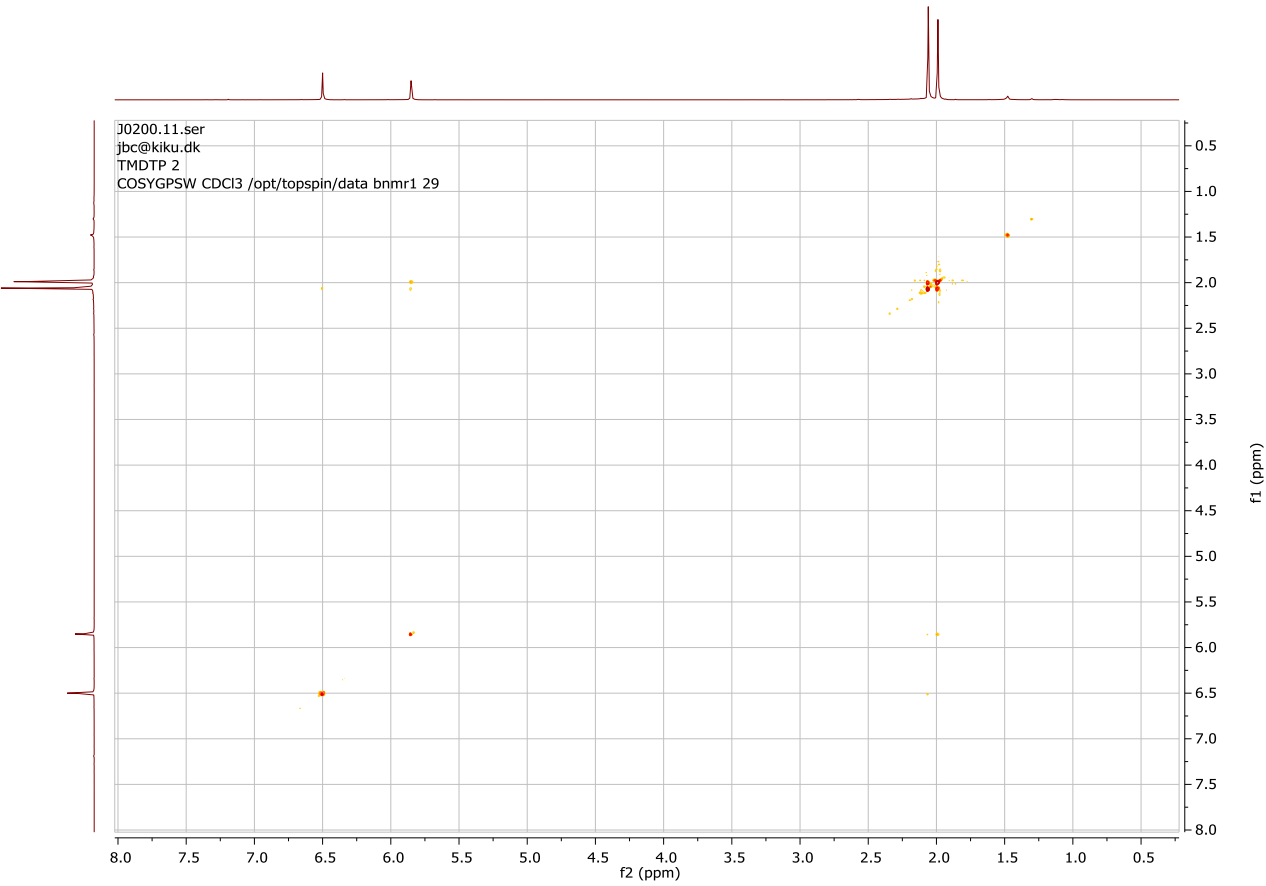

# APT-<sup>13</sup>C-NMR

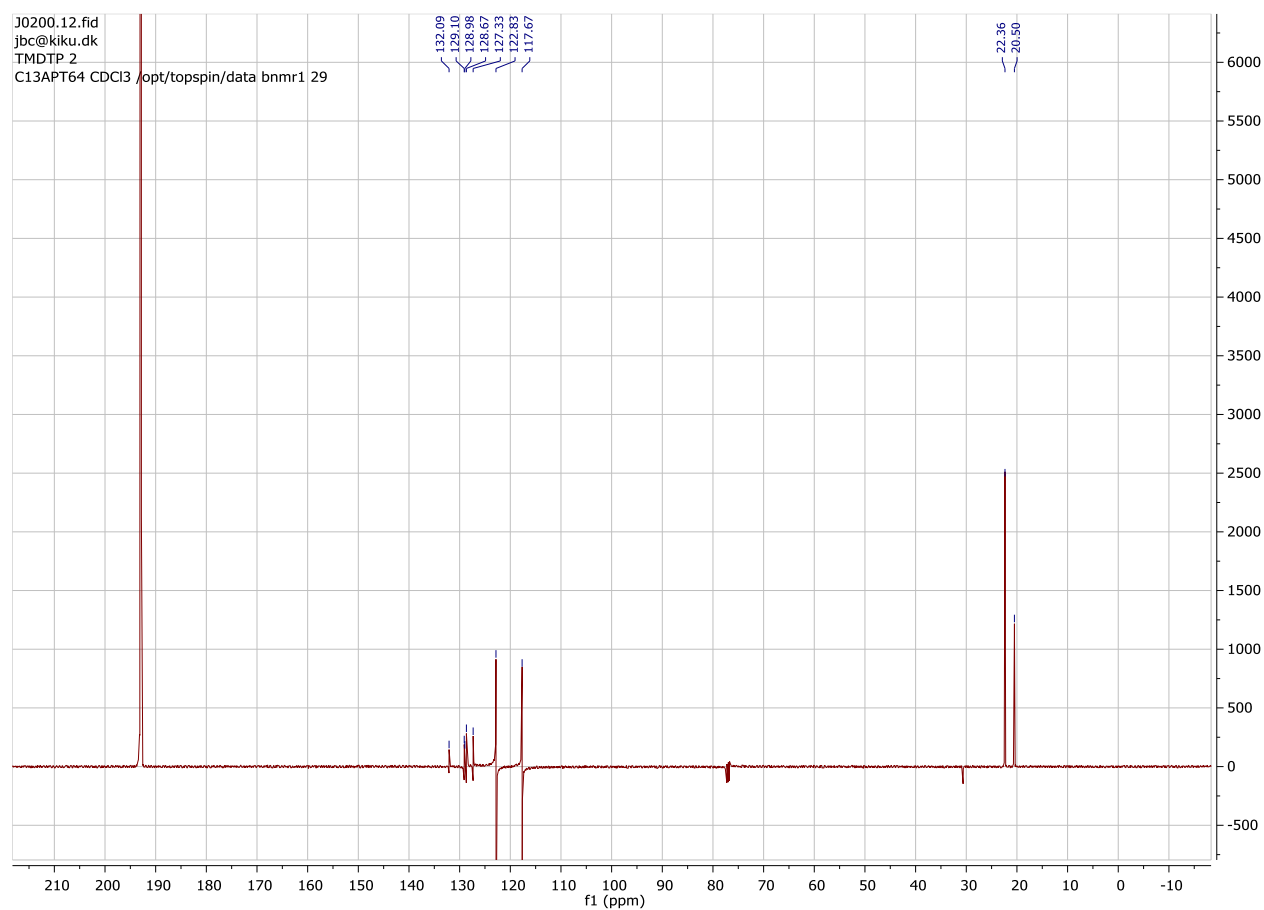

HSQC-NMR

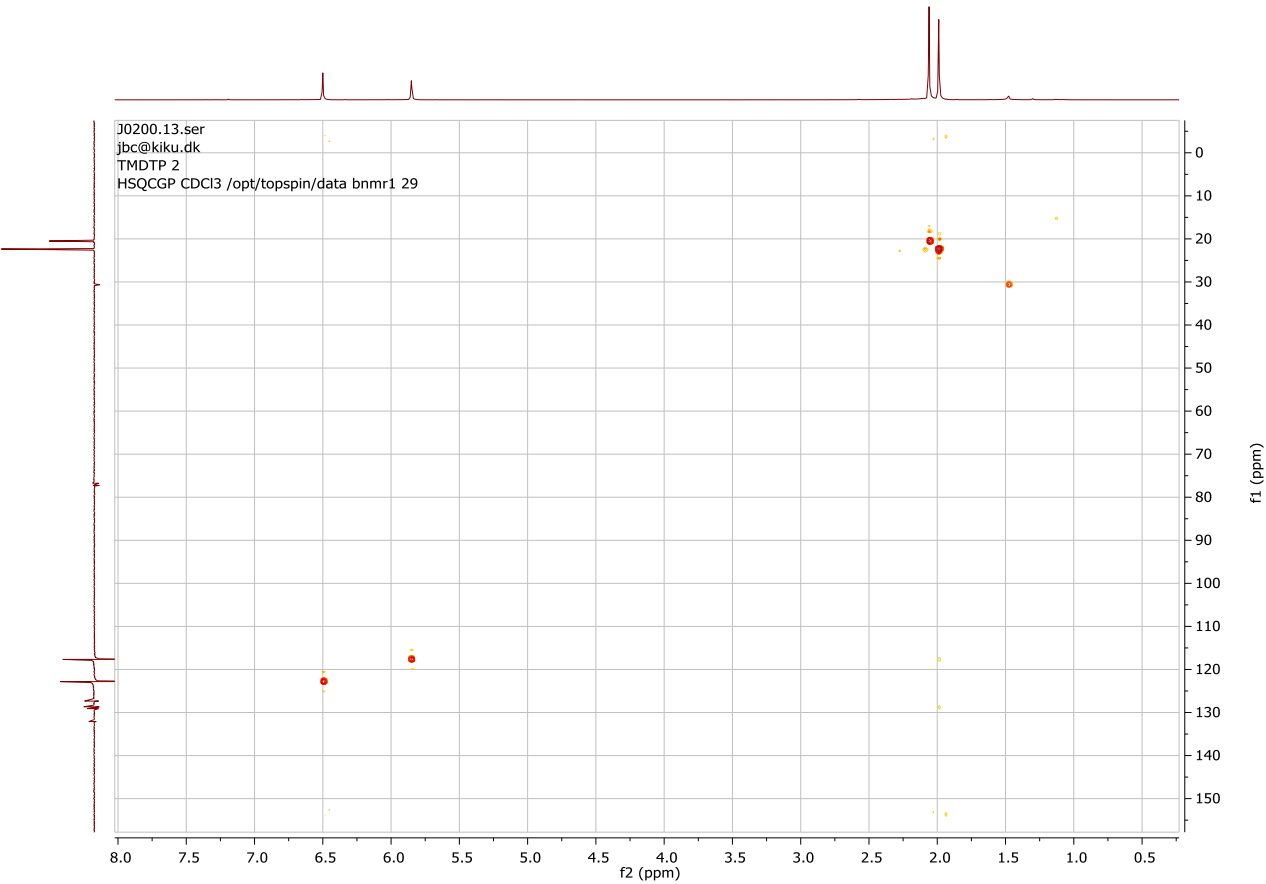

Supplement: RA-011-D1RA00587A-s001 [file RA-011-D1RA00587A-s001.pdf]
